# Supplementary material for: Skeletal photoinduced rearrangement of diarylethenes: ethene bridge effects
Source: Royal Society of Chemistry journal article supplement (doi:10.1039/d2ob02315f), 2023-01-01

**Skeletal Photoinduced Rearrangement of Diarylethenes:  
Ethene Bridge Effects.**

A. V. Zakharov, S. M. Timofeeva, A. V. Yadykov, M. M. Krayushkin, V. Z. Shirinian\*

N. D. Zelinsky Institute of Organic Chemistry, Russian Academy of Sciences,  
47, Leninsky prosp., 119991 Moscow, Russian Federation. E-mail: [svbegunt@mail.ru](mailto:svbegunt@mail.ru)

**Table of Contents**

|                                                                                                  |           |
|--------------------------------------------------------------------------------------------------|-----------|
| <b><i>I. Synthesis and characterization of starting diarylethenes</i></b> .....                  | <b>2</b>  |
| <b><i>I.1. Synthesis of Monooxime 1c</i></b> .....                                               | <b>2</b>  |
| <b><i>I.2. Synthesis of Ketoximes 1d</i></b> .....                                               | <b>2</b>  |
| <b><i>II. <sup>1</sup>H NMR monitoring of photoreaction 1d</i></b> .....                         | <b>4</b>  |
| <b><i>III. DFT calculations</i></b> .....                                                        | <b>5</b>  |
| <b><i>IV. Molecular orbitals</i></b> .....                                                       | <b>21</b> |
| <b><i>V. UV-vis spectra of obtained compounds</i></b> .....                                      | <b>23</b> |
| <b><i>VI. Copies of <sup>1</sup>H and <sup>13</sup>C NMR spectra</i></b> .....                   | <b>33</b> |
| <b><i>VII. Copies of <sup>1</sup>H and <sup>13</sup>C NMR spectra of photoproducts</i></b> ..... | <b>35</b> |
| <b><i>VIII. Copies of HRMS spectra</i></b> .....                                                 | <b>42</b> |

## I. Synthesis and characterization of starting diarylethenes

### I.1. Synthesis of Monooxime 1c.

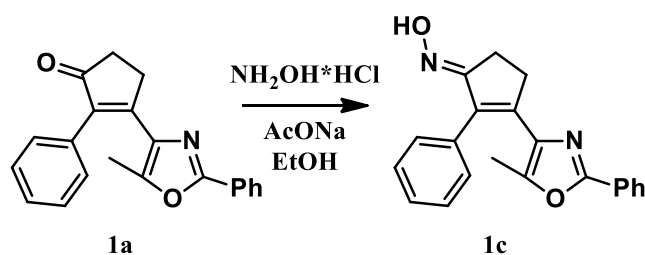

Scheme S1.

The mixture of diarylcyclopentenone (DCP) **1a** (2.0 mmol), hydroxylamine hydrochloride (6.0 mmol) and anhydrous sodium acetate (6.0 mmol) in ethanol (7 mL) was refluxed for 3 h and poured into crushed ice (70 mL). The residue was filtered off, washed with water ( $2\times 30$  mL) and recrystallized from cold ethanol.

### (E)-3-(5-methyl-2-phenyloxazol-4-yl)-2-phenylcyclopent-2-enone oxime (1c)

Beige powder, yield 64% (0.42 g); m.p. 223-225°C;  $^1\text{H}$  NMR (300 MHz,  $\text{DMSO-d}_6$ )  $\delta$  = 1.71 (s, 3H,  $\text{CH}_3$ ), 2.79-2.81 (m, 2H,  $\text{CH}_2$ ), 2.94-2.95 (m, 2H,  $\text{CH}_2$ ), 7.28-7.36 (m, 5H,  $\text{H}^{\text{arom}}$ ), 7.49-7.50 (m, 3H,  $\text{H}^{\text{arom}}$ ), 7.86-7.87 (m, 2H,  $\text{H}^{\text{arom}}$ ), 10.69 (s, 1H,  $\text{NOH}$ );  $^{13}\text{C}$  NMR (75 MHz,  $\text{DMSO-d}_6$ )  $\delta$  = 11.4, 25.9, 32.4, 126.0 (2C), 127.1, 127.6, 128.3 (2C), 129.5 (2C), 129.9 (2C), 130.8, 133.2, 134.6, 137.2, 142.8, 146.2, 159.2, 165.9; HRMS (ESI-TOF)  $m/z$   $[\text{M} + \text{H}]^+$  calc. for  $\text{C}_{21}\text{H}_{18}\text{N}_2\text{O}_2$  331.1441, found 331.1441; MS (EI)  $m/z$  330 (21%)  $[\text{M}]$ , 105 (33%), 77 (35%), 43 (100%).

### I.2. Synthesis of Ketoximes 1d.

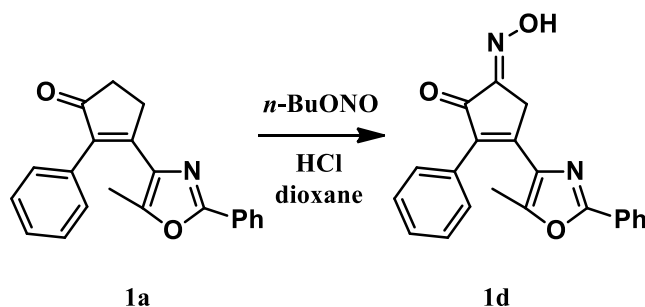

Scheme S2.

To cooled (12 °C) solution of DCP **1a** (3.0 mmol) and fresh-prepared n-butyl nitrite (3.6 mmol) in dioxane (15 mL) conc. hydrochloric acid (0.36 mL) was added dropwise and solution was stirred at room temperature for 2 h. The reaction mixture was poured into cold water (100 mL) and extracted with ethyl acetate ( $3\times 30$  mL), combined organic phases were washed with water (50

mL), dried with magnesium sulfate and evaporated in vacuum. The residue was purified by column chromatography eluting by petrol. ester / ethyl acetate 3:1.

**(E)-5-(hydroxyimino)-3-(5-methyl-2-phenyloxazol-4-yl)-2-phenylcyclopent-2-enone (1d)**

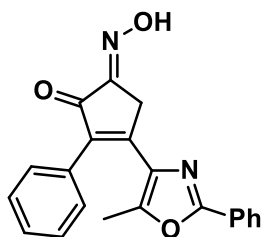

Yellow powder, yield 18% (0.19 g); m.p. 211-213°C; <sup>1</sup>H NMR (300 MHz, DMSO-d<sub>6</sub>)  $\delta$  = 1.97 (s, 3H, CH<sub>3</sub>), 3.74 (s, 2H, CH<sub>2</sub>), 7.31-7.34 (m, 2H, H<sup>arom</sup>), 7.37-7.43 (m, 3H, H<sup>arom</sup>), 7.52-7.53 (m, 3H, H<sup>arom</sup>), 7.85-7.87 (m, 2H, H<sup>arom</sup>), 12.51 (s, 1H, NOH); <sup>13</sup>C NMR (75 MHz, DMSO-d<sub>6</sub>)  $\delta$  = 12.4, 31.1, 126.3 (2C), 126.6, 128.3, 128.5 (2C), 129.6 (2C), 129.8 (2C), 131.3, 132.3, 132.6, 140.9, 150.8, 151.9, 152.7, 159.6, 190.2; HRMS (ESI-TOF) m/z [M + H]<sup>+</sup> calc. for C<sub>21</sub>H<sub>16</sub>N<sub>2</sub>O<sub>3</sub> 345.1234, found 345.1233; MS (EI) m/z 344 (30%) [M], 196 (19%), 154 (38%), 105 (48%), 77 (46%), 43 (100%).

II.  $^1\text{H}$  NMR monitoring of photoreaction 1d.

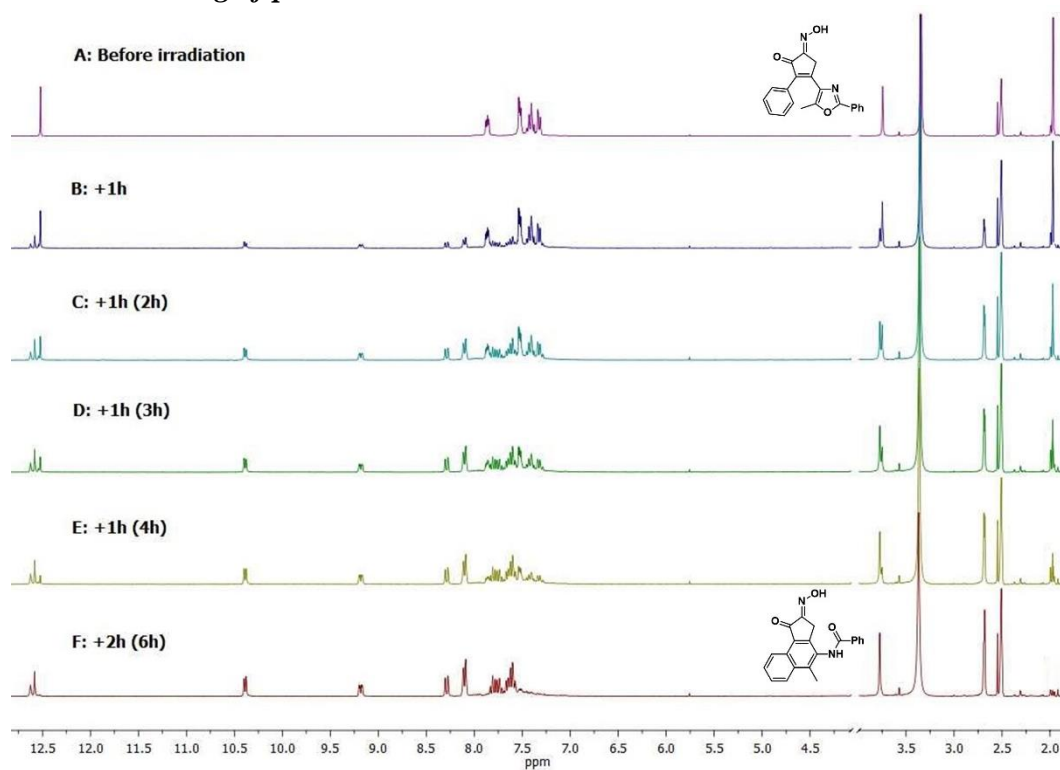

**Fig. S1.**  $^1\text{H}$  NMR monitoring of photoreaction of **1d** in  $\text{DMSO-d}_6$  induced by UV light (365 nm).

### III. DFT calculations

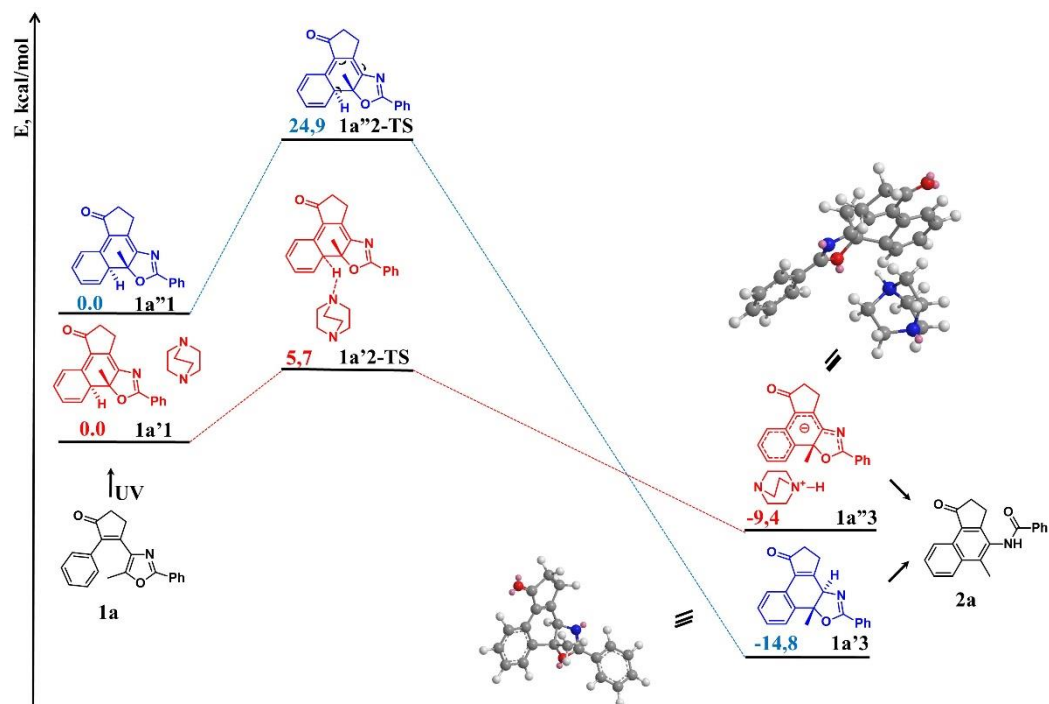

**Fig. S2.** Energy profile of the [1,5]-shift and proton elimination of a **1a**.

Cartesian coordinate columns of the optimized structure of compound **1f**'1 (B3LYP/6-31g(d,p))

PCM=toluene

Imaginary Freq = 0

EE + Thermal Enthalpy Correction = -1051.265438

EE + Thermal Free Energy Correction = -1051.331207

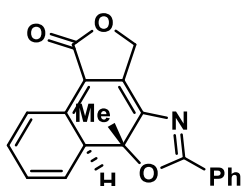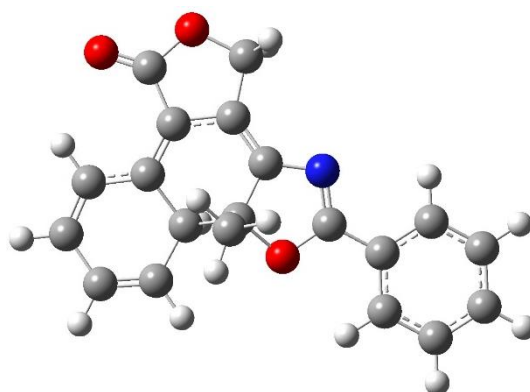

|    |   |            |            |            |
|----|---|------------|------------|------------|
| 1  | C | 2.5090800  | -0.7883270 | -0.0444190 |
| 2  | C | 1.2829440  | -1.5416990 | 0.0576290  |
| 3  | C | 1.6314290  | -2.9972590 | -0.0886670 |
| 4  | O | 3.0786800  | -3.0253620 | -0.1326410 |
| 5  | C | 3.6168620  | -1.7622670 | -0.1225070 |
| 6  | C | 2.5467790  | 0.5752440  | -0.2077840 |
| 7  | C | 1.1949030  | 1.2943070  | -0.3494760 |
| 8  | C | 0.1436120  | 0.6111640  | 0.5211070  |
| 9  | C | 0.1161760  | -0.8854370 | 0.2348790  |
| 10 | C | 3.7481100  | 1.3464740  | -0.3577080 |
| 11 | C | 3.7028420  | 2.7061590  | -0.4155000 |
| 12 | C | 2.4524220  | 3.4380160  | -0.3003800 |
| 13 | C | 1.2749790  | 2.7919450  | -0.2184050 |
| 14 | O | -1.2209960 | 0.9691030  | 0.1186900  |
| 15 | C | -1.9053910 | -0.2133150 | 0.0859960  |
| 16 | N | -1.2000710 | -1.3079580 | 0.1611190  |
| 17 | O | 4.8158290  | -1.5898450 | -0.1805530 |
| 18 | C | -3.3554780 | -0.1414340 | -0.0618990 |
| 19 | C | -4.1021410 | -1.3293210 | -0.1538580 |

|    |   |            |            |            |
|----|---|------------|------------|------------|
| 20 | C | -5.4841350 | -1.2719030 | -0.2963770 |
| 21 | C | -6.1341550 | -0.0343920 | -0.3499090 |
| 22 | C | -5.3961020 | 1.1479780  | -0.2594470 |
| 23 | C | -4.0115850 | 1.0995880  | -0.1150860 |
| 24 | C | 0.2814790  | 0.9118240  | 2.0205340  |
| 25 | H | 0.8768120  | 1.0909120  | -1.3957540 |
| 26 | H | 1.3027740  | -3.6093410 | 0.7568150  |
| 27 | H | 1.2507980  | -3.4476020 | -1.0122460 |
| 28 | H | 4.6913730  | 0.8125550  | -0.3787990 |
| 29 | H | 4.6261490  | 3.2698750  | -0.5096550 |
| 30 | H | 2.4872130  | 4.5230670  | -0.2651440 |
| 31 | H | 0.3377000  | 3.3337720  | -0.1304670 |
| 32 | H | -3.5825910 | -2.2800800 | -0.1125760 |
| 33 | H | -6.0574880 | -2.1910070 | -0.3669610 |
| 34 | H | -7.2134680 | 0.0069860  | -0.4615860 |
| 35 | H | -5.9000710 | 2.1086360  | -0.3002010 |
| 36 | H | -3.4329710 | 2.0131640  | -0.0411000 |
| 37 | H | 1.2726680  | 0.6163310  | 2.3735700  |
| 38 | H | 0.1469780  | 1.9789300  | 2.2139890  |
| 39 | H | -0.4692440 | 0.3542680  | 2.5859960  |

Transition state of [1,5]-shift of compound **1f''2** (B3LYP/6-31g(d,p), Berny algorithm)

PCM=toluene

Imaginary Freq = 1

EE + Thermal Enthalpy Correction = -1051.225175

EE + Thermal Free Energy Correction = -1051.290168

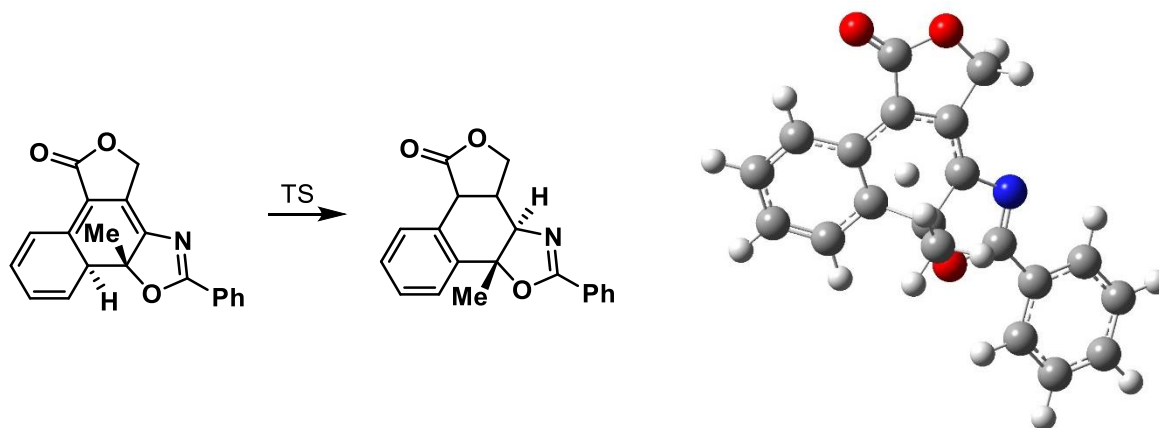

|    |   |            |            |            |
|----|---|------------|------------|------------|
| 1  | C | 2.5750540  | -0.7172210 | 0.1111000  |
| 2  | C | 1.4115810  | -1.4713490 | 0.0231500  |
| 3  | C | 1.7883790  | -2.9064040 | -0.1954090 |
| 4  | O | 3.2295570  | -2.9097790 | -0.1683480 |
| 5  | C | 3.7226180  | -1.6313120 | -0.0203350 |
| 6  | C | 2.5153650  | 0.6915760  | -0.0345680 |
| 7  | C | 1.1725880  | 1.2853270  | -0.0566140 |
| 8  | C | 0.1297650  | 0.5403300  | 0.7631290  |
| 9  | C | 0.1842300  | -0.7881020 | 0.0120760  |
| 10 | C | 3.6287040  | 1.4999660  | -0.3780560 |
| 11 | C | 3.4553460  | 2.8232320  | -0.7165170 |
| 12 | C | 2.1625420  | 3.4159960  | -0.7142030 |
| 13 | C | 1.0584350  | 2.6890060  | -0.3521370 |
| 14 | O | -1.2385600 | 0.9308500  | 0.4103700  |
| 15 | C | -1.8726840 | -0.2311470 | 0.0476600  |
| 16 | N | -1.1222840 | -1.2670870 | -0.1718190 |
| 17 | O | 4.9136660  | -1.4100210 | -0.0104240 |
| 18 | C | -3.3267210 | -0.1773610 | -0.0847360 |
| 19 | C | -4.0195420 | -1.3047570 | -0.5588570 |
| 20 | C | -5.4038940 | -1.2665690 | -0.6850810 |
| 21 | C | -6.1086150 | -0.1075750 | -0.3434850 |
| 22 | C | -5.4236490 | 1.0149880  | 0.1266760  |



|    |   |            |            |            |
|----|---|------------|------------|------------|
| 23 | C | -4.0370540 | 0.9844120  | 0.2579300  |
| 24 | C | 0.2595110  | 0.5566590  | 2.2802320  |
| 25 | H | 0.6277690  | 0.3321390  | -0.9989370 |
| 26 | H | 1.4230340  | -3.5709310 | 0.5949500  |
| 27 | H | 1.4494010  | -3.2983960 | -1.1606000 |
| 28 | H | 4.6108280  | 1.0404670  | -0.3851520 |
| 29 | H | 4.3159060  | 3.4252710  | -0.9915210 |
| 30 | H | 2.0586720  | 4.4656620  | -0.9731310 |
| 31 | H | 0.0764610  | 3.1479880  | -0.3026570 |
| 32 | H | -3.4580620 | -2.1940890 | -0.8225590 |
| 33 | H | -5.9362290 | -2.1386900 | -1.0518010 |
| 34 | H | -7.1894720 | -0.0807500 | -0.4442240 |
| 35 | H | -5.9701220 | 1.9144340  | 0.3927900  |
| 36 | H | -3.4990980 | 1.8504250  | 0.6259210  |
| 37 | H | 1.2542180  | 0.2176730  | 2.5795600  |
| 38 | H | 0.1102410  | 1.5716450  | 2.6591020  |
| 39 | H | -0.4866100 | -0.0998130 | 2.7364920  |

Cartesian coordinate columns of the optimized structure of compound **1f**'3 (B3LYP/6-31g(d,p))

PCM=toluene

Imaginary Freq = 0

EE + Thermal Enthalpy Correction = -1051.287096

EE + Thermal Free Energy Correction = -1051.352311

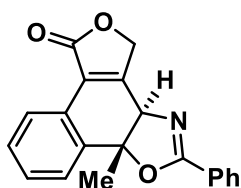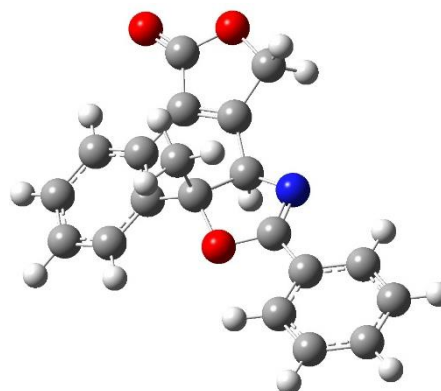

|    |   |            |            |            |
|----|---|------------|------------|------------|
| 1  | C | 2.5408150  | -0.7547770 | -0.0532280 |
| 2  | C | 1.4198580  | -1.5040420 | -0.1523110 |
| 3  | C | 1.7736760  | -2.9515310 | -0.0818160 |
| 4  | O | 3.2026540  | -2.9624050 | 0.0769560  |
| 5  | C | 3.6921140  | -1.6743700 | 0.0812740  |
| 6  | C | 2.5339540  | 0.7153610  | -0.1387430 |
| 7  | C | 1.2890880  | 1.3903220  | 0.0166280  |
| 8  | C | 0.1313030  | 0.5070270  | 0.4216730  |
| 9  | C | 0.1600350  | -0.7639630 | -0.4354350 |
| 10 | C | 3.6884230  | 1.4661060  | -0.3933150 |
| 11 | C | 3.6097650  | 2.8545280  | -0.5163300 |
| 12 | C | 2.3840770  | 3.5067130  | -0.3810080 |
| 13 | C | 1.2257230  | 2.7741030  | -0.0998080 |
| 14 | O | -1.2179310 | 0.9604510  | 0.0908190  |
| 15 | C | -1.9035320 | -0.2204900 | -0.1343980 |
| 16 | N | -1.2058690 | -1.2832660 | -0.3412280 |
| 17 | O | 4.8759950  | -1.4437670 | 0.1789820  |
| 18 | C | -3.3686430 | -0.1330510 | -0.1207910 |
| 19 | C | -4.1301980 | -1.2570800 | -0.4792200 |
| 20 | C | -5.5197200 | -1.1900380 | -0.4621790 |

|    |   |            |            |            |
|----|---|------------|------------|------------|
| 21 | C | -6.1607650 | -0.0026950 | -0.0945790 |
| 22 | C | -5.4066520 | 1.1179940  | 0.2584410  |
| 23 | C | -4.0141260 | 1.0564060  | 0.2480560  |
| 24 | C | 0.1473310  | 0.2702690  | 1.9434960  |
| 25 | H | 0.2795420  | -0.4211760 | -1.4823570 |
| 26 | H | 1.5095440  | -3.5018490 | -0.9926470 |
| 27 | H | 1.3151530  | -3.4654360 | 0.7711860  |
| 28 | H | 4.6376170  | 0.9519420  | -0.4945910 |
| 29 | H | 4.5096870  | 3.4263020  | -0.7211640 |
| 30 | H | 2.3264150  | 4.5858610  | -0.4861120 |
| 31 | H | 0.2716670  | 3.2775450  | 0.0218390  |
| 32 | H | -3.6175730 | -2.1681870 | -0.7674790 |
| 33 | H | -6.1053120 | -2.0613970 | -0.7388070 |
| 34 | H | -7.2454960 | 0.0477130  | -0.0848310 |
| 35 | H | -5.9028220 | 2.0403990  | 0.5442060  |
| 36 | H | -3.4219810 | 1.9207780  | 0.5254150  |
| 37 | H | -0.0647790 | 1.2185060  | 2.4439100  |
| 38 | H | -0.6134120 | -0.4587190 | 2.2347030  |
| 39 | H | 1.1219380  | -0.0844040 | 2.2828290  |

Cartesian coordinate columns of the optimized structure of compound **1f1** (B3LYP/6-31g(d,p))

PCM=toluene

Imaginary Freq = 0

EE + Thermal Enthalpy Correction = -1396.426402

EE + Thermal Free Energy Correction = -1396.515841

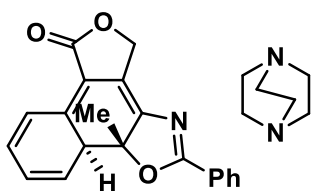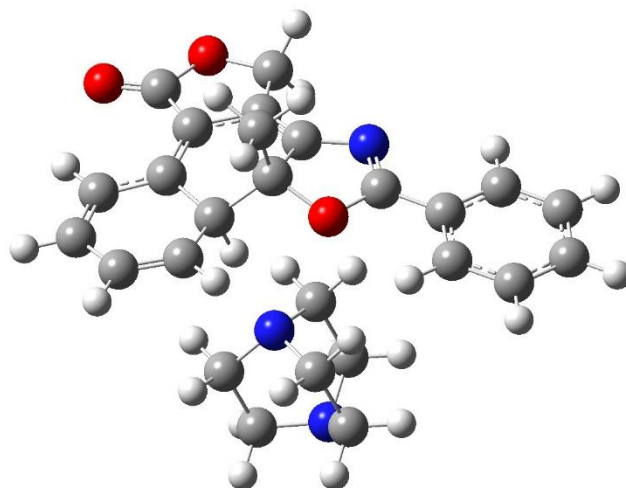

|    |   |            |            |            |
|----|---|------------|------------|------------|
| 1  | C | -2.7534640 | 1.1540940  | -0.6326800 |
| 2  | C | -1.5640630 | 1.6032750  | -1.3153870 |
| 3  | C | -1.9257810 | 1.8168930  | -2.7595320 |
| 4  | O | -3.3563310 | 1.6020900  | -2.8165830 |
| 5  | C | -3.8623960 | 1.2019260  | -1.6019850 |
| 6  | C | -2.7360960 | 0.6226480  | 0.6359540  |
| 7  | C | -1.3670350 | 0.4583160  | 1.3050100  |
| 8  | C | -0.4350410 | 1.5937670  | 0.8923690  |
| 9  | C | -0.4110860 | 1.7296010  | -0.6252590 |
| 10 | C | -3.8922820 | 0.1171340  | 1.3198020  |
| 11 | C | -3.8097990 | -0.3062080 | 2.6122600  |
| 12 | C | -2.5694990 | -0.2409690 | 3.3643660  |
| 13 | C | -1.4286580 | 0.1690790  | 2.7775110  |
| 14 | O | 0.9776780  | 1.2674500  | 1.1371540  |
| 15 | C | 1.6312440  | 1.6332480  | -0.0056610 |
| 16 | N | 0.8965850  | 1.9204960  | -1.0436300 |
| 17 | O | -5.0418890 | 0.9489990  | -1.4693780 |

|    |   |            |            |            |
|----|---|------------|------------|------------|
| 18 | C | 3.0911000  | 1.6273990  | 0.0304050  |
| 19 | C | 3.8159210  | 1.9514540  | -1.1302170 |
| 20 | C | 5.2061990  | 1.9461750  | -1.1058460 |
| 21 | C | 5.8878620  | 1.6171710  | 0.0707430  |
| 22 | C | 5.1722180  | 1.2946860  | 1.2258360  |
| 23 | C | 3.7790630  | 1.2999590  | 1.2108820  |
| 24 | C | -0.7242470 | 2.9316880  | 1.5883940  |
| 25 | C | 2.0681190  | -3.7500640 | 0.2114770  |
| 26 | N | 1.2961450  | -4.4181770 | -0.8521610 |
| 27 | C | 1.2878430  | -2.5050010 | 0.7452640  |
| 28 | C | 1.0792030  | -3.4612790 | -1.9529250 |
| 29 | C | -0.7973990 | -3.5691700 | 0.2043540  |
| 30 | N | 0.0164810  | -2.3519440 | 0.0082540  |
| 31 | C | -0.0135400 | -4.8222300 | -0.3074300 |
| 32 | C | 0.3110430  | -2.2026600 | -1.4323440 |
| 33 | H | -1.7173800 | 2.8315710  | -3.1130110 |
| 34 | H | -1.4432680 | 1.1069700  | -3.4408970 |
| 35 | H | -0.9413010 | -0.4664060 | 0.8354630  |
| 36 | H | -4.8375980 | 0.1259960  | 0.7889990  |
| 37 | H | -4.7026170 | -0.6662400 | 3.1152650  |
| 38 | H | -2.5831430 | -0.5118710 | 4.4161630  |
| 39 | H | -0.4976790 | 0.2250760  | 3.3348240  |
| 40 | H | 3.2729960  | 2.2032300  | -2.0344070 |
| 41 | H | 5.7619370  | 2.1978800  | -2.0038650 |
| 42 | H | 6.9736100  | 1.6138020  | 0.0859920  |
| 43 | H | 5.6999170  | 1.0413890  | 2.1401890  |
| 44 | H | 3.2171380  | 1.0573080  | 2.1054960  |
| 45 | H | -1.7554130 | 3.2388500  | 1.3957710  |
| 46 | H | -0.5845490 | 2.8425830  | 2.6688030  |
| 47 | H | -0.0545050 | 3.7082190  | 1.2100540  |
| 48 | H | 2.2522970  | -4.4779630 | 1.0095460  |
| 49 | H | 3.0410930  | -3.4630450 | -0.2024080 |

|    |   |            |            |            |
|----|---|------------|------------|------------|
| 50 | H | 1.0491680  | -2.6067980 | 1.8097320  |
| 51 | H | 1.8640770  | -1.5817720 | 0.6258950  |
| 52 | H | 2.0565440  | -3.1889780 | -2.3665320 |
| 53 | H | 0.5183690  | -3.9718310 | -2.7435600 |
| 54 | H | -1.0361290 | -3.6507740 | 1.2702880  |
| 55 | H | -1.7415780 | -3.4368220 | -0.3346810 |
| 56 | H | -0.5664290 | -5.3432740 | -1.0967890 |
| 57 | H | 0.1607670  | -5.5409180 | 0.5009930  |
| 58 | H | 0.8963040  | -1.2868920 | -1.5669930 |
| 59 | H | -0.6393480 | -2.0658150 | -1.9592720 |

Transition state of [1,5]-shift of compound **1f'2** (B3LYP/6-31g(d,p), Berny algorithm)

PCM=toluene

Imaginary Freq = 1

EE + Thermal Enthalpy Correction = -1396.421476

EE + Thermal Free Energy Correction = -1396.505854

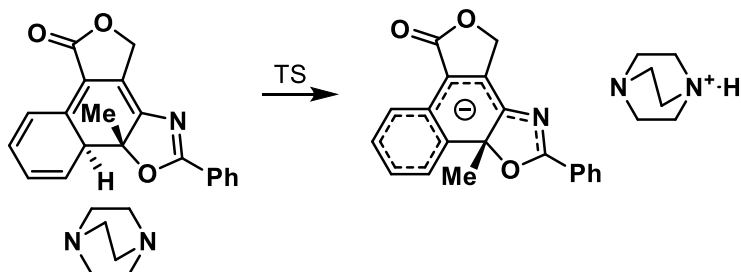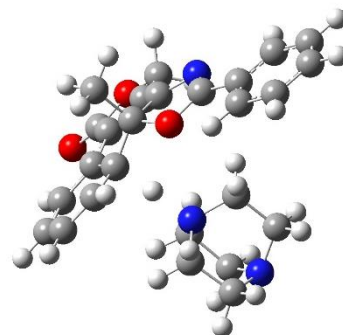

|    |   |            |            |            |
|----|---|------------|------------|------------|
| 1  | C | 2.3657480  | -1.6045860 | -0.4157780 |
| 2  | C | 1.1233120  | -1.9891160 | -1.0225840 |
| 3  | C | 1.4426220  | -2.5040010 | -2.4010780 |
| 4  | O | 2.8819430  | -2.4517270 | -2.4963420 |
| 5  | C | 3.4389790  | -1.9003850 | -1.3514390 |
| 6  | C | 2.4084170  | -0.8433220 | 0.7571080  |
| 7  | C | 1.1239910  | -0.4475520 | 1.3865850  |
| 8  | C | -0.0205070 | -1.4068470 | 1.1055310  |
| 9  | C | -0.0438580 | -1.7999070 | -0.3639360 |
| 10 | C | 3.6149920  | -0.3295250 | 1.3298370  |
| 11 | C | 3.5943700  | 0.3813310  | 2.5031010  |
| 12 | C | 2.3756320  | 0.6315480  | 3.2130690  |
| 13 | C | 1.1949260  | 0.1750710  | 2.7020490  |
| 14 | O | -1.3425740 | -0.7580370 | 1.2142050  |
| 15 | C | -2.0446740 | -1.2072770 | 0.1193510  |
| 16 | N | -1.3614700 | -1.8121970 | -0.8075520 |
| 17 | O | 4.6441290  | -1.7355250 | -1.2767750 |
| 18 | C | -3.4719380 | -0.9045460 | 0.0752640  |
| 19 | C | -4.2251510 | -1.2501090 | -1.0619380 |
| 20 | C | -5.5849570 | -0.9645120 | -1.1118000 |
| 21 | C | -6.2126820 | -0.3301250 | -0.0338080 |

|    |   |            |            |            |
|----|---|------------|------------|------------|
| 22 | C | -5.4705110 | 0.0145310  | 1.0975050  |
| 23 | C | -4.1075080 | -0.2711060 | 1.1571320  |
| 24 | C | -0.0433360 | -2.6299120 | 2.0366880  |
| 25 | C | -0.7545930 | 3.9100910  | -0.1863490 |
| 26 | N | 0.1489730  | 4.0373600  | -1.3414320 |
| 27 | C | -0.5246830 | 2.5509210  | 0.5452850  |
| 28 | C | -0.0738210 | 2.9005660  | -2.2499080 |
| 29 | C | 1.8203490  | 2.6880010  | -0.0702700 |
| 30 | N | 0.6005140  | 1.8348020  | -0.1142850 |
| 31 | C | 1.5418430  | 4.0029210  | -0.8664630 |
| 32 | C | 0.2501090  | 1.5511770  | -1.5341290 |
| 33 | H | 1.1209000  | -3.5398120 | -2.5541290 |
| 34 | H | 1.0148680  | -1.8925280 | -3.2047990 |
| 35 | H | 0.8521400  | 0.6421230  | 0.6247550  |
| 36 | H | 4.5488510  | -0.5567300 | 0.8278320  |
| 37 | H | 4.5304530  | 0.7404850  | 2.9225560  |
| 38 | H | 2.4053950  | 1.1487790  | 4.1671190  |
| 39 | H | 0.2640360  | 0.3245230  | 3.2436520  |
| 40 | H | -3.7259490 | -1.7401810 | -1.8906470 |
| 41 | H | -6.1598670 | -1.2355890 | -1.9922400 |
| 42 | H | -7.2750150 | -0.1091950 | -0.0762020 |
| 43 | H | -5.9549510 | 0.5024660  | 1.9380660  |
| 44 | H | -3.5296290 | -0.0170820 | 2.0384970  |
| 45 | H | 0.9070640  | -3.1656500 | 1.9613120  |
| 46 | H | -0.1880530 | -2.3225790 | 3.0765880  |
| 47 | H | -0.8497070 | -3.3128050 | 1.7540020  |
| 48 | H | -0.5710910 | 4.7524730  | 0.4876710  |
| 49 | H | -1.7865140 | 3.9890180  | -0.5416160 |
| 50 | H | -0.2568780 | 2.6864230  | 1.5972020  |
| 51 | H | -1.3993630 | 1.8977580  | 0.5064520  |
| 52 | H | -1.1159620 | 2.9259250  | -2.5826700 |
| 53 | H | 0.5586270  | 3.0318990  | -3.1331030 |



|    |   |            |           |            |
|----|---|------------|-----------|------------|
| 54 | H | 2.0471420  | 2.8800340 | 0.9809830  |
| 55 | H | 2.6475260  | 2.1114750 | -0.4913170 |
| 56 | H | 2.2030480  | 4.0808760 | -1.7346750 |
| 57 | H | 1.7171730  | 4.8809460 | -0.2373760 |
| 58 | H | -0.5949290 | 0.8596090 | -1.5435950 |
| 59 | H | 1.1041530  | 1.0399180 | -1.9842860 |

Cartesian coordinate columns of the optimized structure of compound **1f3** (B3LYP/6-31g(d,p))

PCM=toluene

Imaginary Freq = 0

EE + Thermal Enthalpy Correction = -1396.442785

EE + Thermal Free Energy Correction = -1396.529484

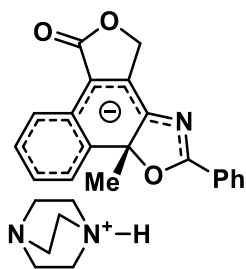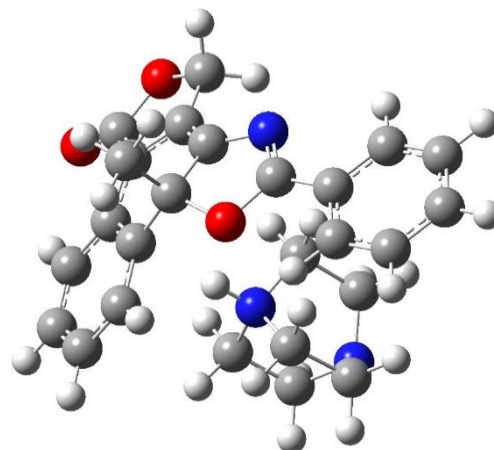

|    |   |            |            |            |
|----|---|------------|------------|------------|
| 1  | C | 2.4621410  | -1.4628010 | -0.5348830 |
| 2  | C | 1.2590540  | -1.7965040 | -1.2090020 |
| 3  | C | 1.6044740  | -1.9982690 | -2.6619690 |
| 4  | O | 3.0160840  | -1.7399330 | -2.7551890 |
| 5  | C | 3.5279570  | -1.3936680 | -1.4975490 |
| 6  | C | 2.4282360  | -0.9198000 | 0.7957920  |
| 7  | C | 1.1884620  | -0.9391550 | 1.5221560  |
| 8  | C | 0.0457860  | -1.7678050 | 0.9689120  |
| 9  | C | 0.0653580  | -1.8154200 | -0.5472770 |
| 10 | C | 3.5352650  | -0.2698830 | 1.4028410  |
| 11 | C | 3.4180000  | 0.3388420  | 2.6438970  |
| 12 | C | 2.1946950  | 0.3389150  | 3.3373780  |
| 13 | C | 1.0984100  | -0.3125400 | 2.7757060  |
| 14 | O | -1.2735950 | -1.1394850 | 1.1894240  |
| 15 | C | -1.9520340 | -1.3126710 | -0.0078680 |
| 16 | N | -1.2333040 | -1.6957350 | -1.0229970 |
| 17 | O | 4.7072580  | -1.0824680 | -1.3962210 |
| 18 | C | -3.3618560 | -0.9519880 | -0.0300840 |
| 19 | C | -4.0932600 | -1.0306790 | -1.2326390 |
| 20 | C | -5.4380460 | -0.6812960 | -1.2603720 |

|    |   |            |            |            |
|----|---|------------|------------|------------|
| 21 | C | -6.0817780 | -0.2444170 | -0.0958700 |
| 22 | C | -5.3650410 | -0.1661580 | 1.0996470  |
| 23 | C | -4.0169040 | -0.5194730 | 1.1388220  |
| 24 | C | -0.0088420 | -3.1660560 | 1.6093630  |
| 25 | C | -1.0535430 | 3.6619630  | 0.0945530  |
| 26 | N | -0.0906970 | 4.0212760  | -0.9561220 |
| 27 | C | -0.6876890 | 2.2934090  | 0.7396910  |
| 28 | C | -0.1225500 | 3.0053450  | -2.0182940 |
| 29 | C | 1.6909350  | 2.7187780  | 0.2090360  |
| 30 | N | 0.5307260  | 1.7722180  | 0.0162220  |
| 31 | C | 1.2608780  | 4.0939140  | -0.3834120 |
| 32 | C | 0.2404420  | 1.5997800  | -1.4567950 |
| 33 | H | 1.4090570  | -3.0241570 | -2.9962290 |
| 34 | H | 1.0699950  | -1.3197890 | -3.3392100 |
| 35 | H | 0.7802070  | 0.8517100  | 0.4271900  |
| 36 | H | 4.4735240  | -0.2563930 | 0.8588480  |
| 37 | H | 4.2858110  | 0.8250880  | 3.0823950  |
| 38 | H | 2.1132390  | 0.8081780  | 4.3131550  |
| 39 | H | 0.1536890  | -0.3523350 | 3.3118400  |
| 40 | H | -3.5872520 | -1.3711560 | -2.1296230 |
| 41 | H | -5.9910890 | -0.7493160 | -2.1928120 |
| 42 | H | -7.1330840 | 0.0260950  | -0.1218320 |
| 43 | H | -5.8592570 | 0.1639590  | 2.0089880  |
| 44 | H | -3.4642890 | -0.4765900 | 2.0706600  |
| 45 | H | 0.9412390  | -3.6812660 | 1.4410820  |
| 46 | H | -0.1766910 | -3.0882310 | 2.6884620  |
| 47 | H | -0.8112430 | -3.7614850 | 1.1630310  |
| 48 | H | -1.0579600 | 4.4506820  | 0.8511310  |
| 49 | H | -2.0516930 | 3.6187930  | -0.3482030 |
| 50 | H | -0.4142450 | 2.3702230  | 1.7933670  |
| 51 | H | -1.4676830 | 1.5377870  | 0.6423800  |
| 52 | H | -1.1225620 | 2.9917020  | -2.4587700 |
| 53 | H | 0.5820800  | 3.2971360  | -2.8009770 |
| 54 | H | 1.9013500  | 2.7482740  | 1.2789840  |
| 55 | H | 2.5497970  | 2.2763960  | -0.2972080 |

|    |   |            |           |            |
|----|---|------------|-----------|------------|
| 56 | H | 1.9571990  | 4.4038100 | -1.1665510 |
| 57 | H | 1.2692090  | 4.8630480 | 0.3931450  |
| 58 | H | -0.5655250 | 0.8697960 | -1.5436960 |
| 59 | H | 1.1398120  | 1.1746430 | -1.9040580 |

#### IV. Molecular orbitals

Molecular orbitals of **1f** and **2f** according to B3LYP/6-31g(d,p) level of theory.

| №/<br>№ <sub>2</sub> | Compound                                                                            | HOMO                                                                                 | LUMO                                                                                  |
|----------------------|-------------------------------------------------------------------------------------|--------------------------------------------------------------------------------------|---------------------------------------------------------------------------------------|
| 1                    | 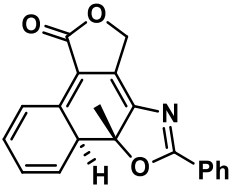   |    |    |
| 2                    |    |    |    |
| 3                    |  |   |   |
| 4                    |  |  |  |
| 5                    |  |  |  |

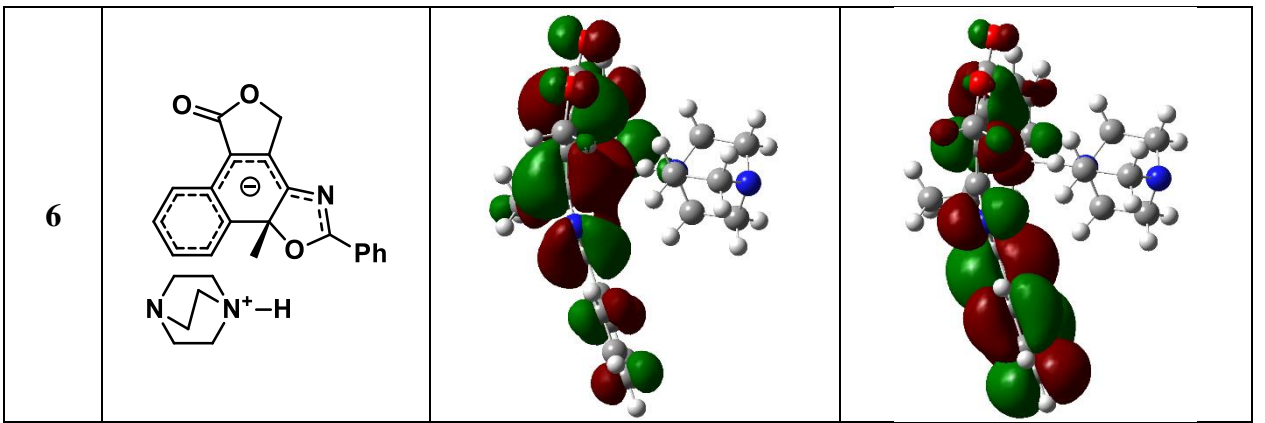

## V. UV-vis spectra of obtained compounds

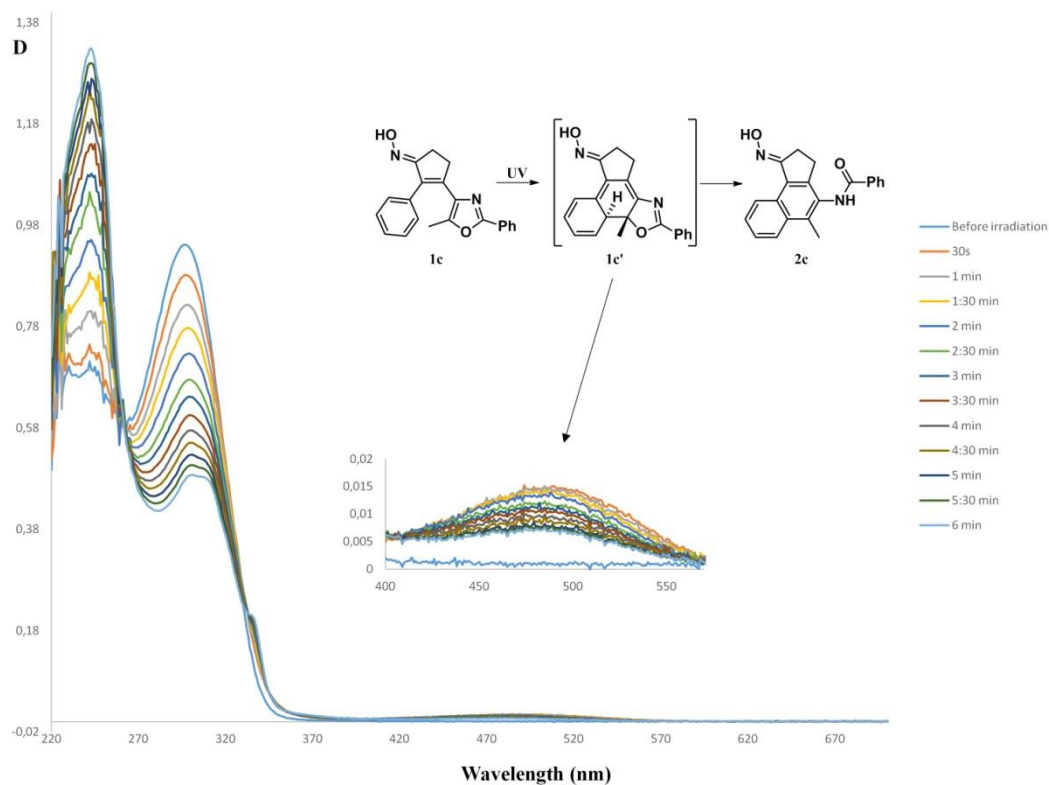

**Fig. S3.** Absorption spectra of an acetonitrile solution of **1c** obtained under irradiation with UV light ( $\lambda = 365$  nm);  $C = 3.0 \times 10^{-5}$  M,  $T = 298^\circ\text{K}$ .

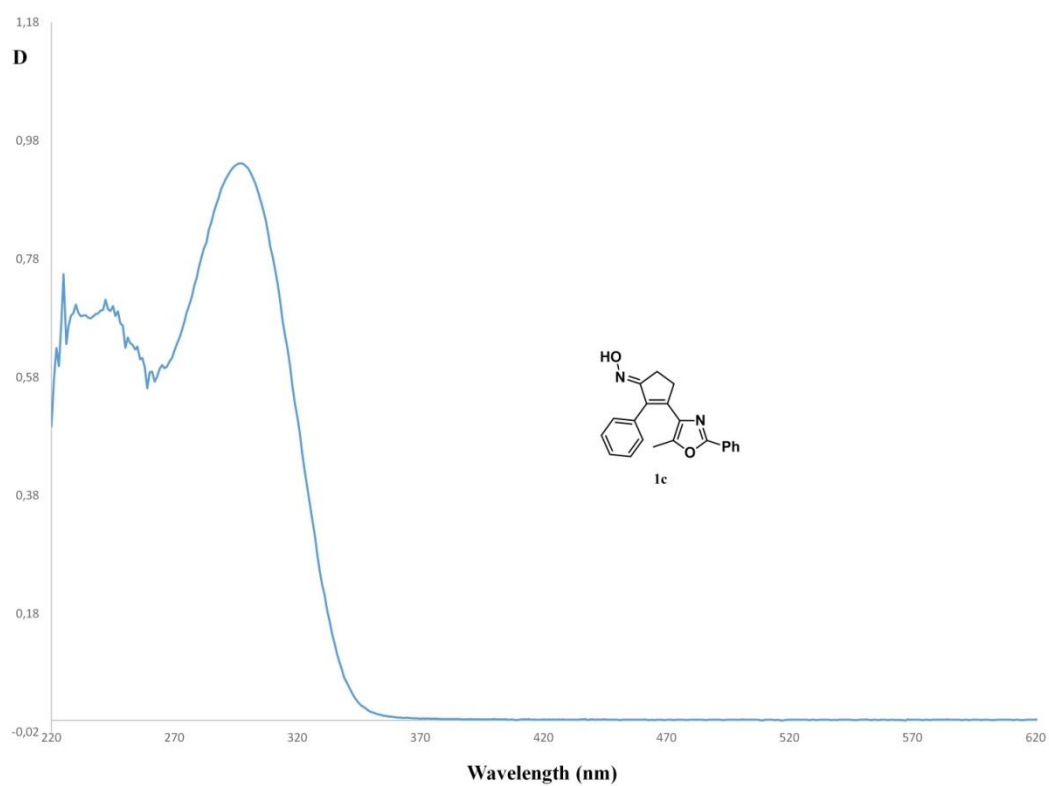

**Fig. S4.** UV absorption spectrum of diarylethene **1c** in acetonitrile solution ( $C = 3.0 \times 10^{-5}$  M,  $T = 298^\circ\text{K}$ ).

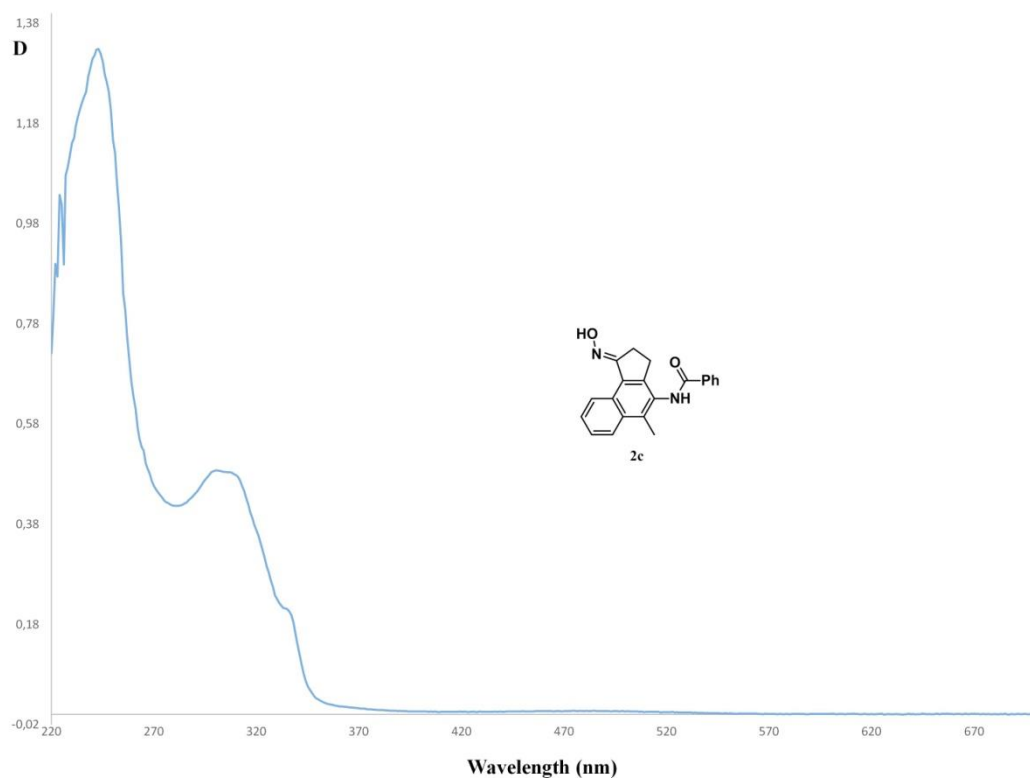

**Fig. S5.** UV absorption spectrum of photoproduct **2c** in acetonitrile solution ( $C = 3.0 \times 10^{-5}$  M),  $T = 298^\circ\text{K}$ .

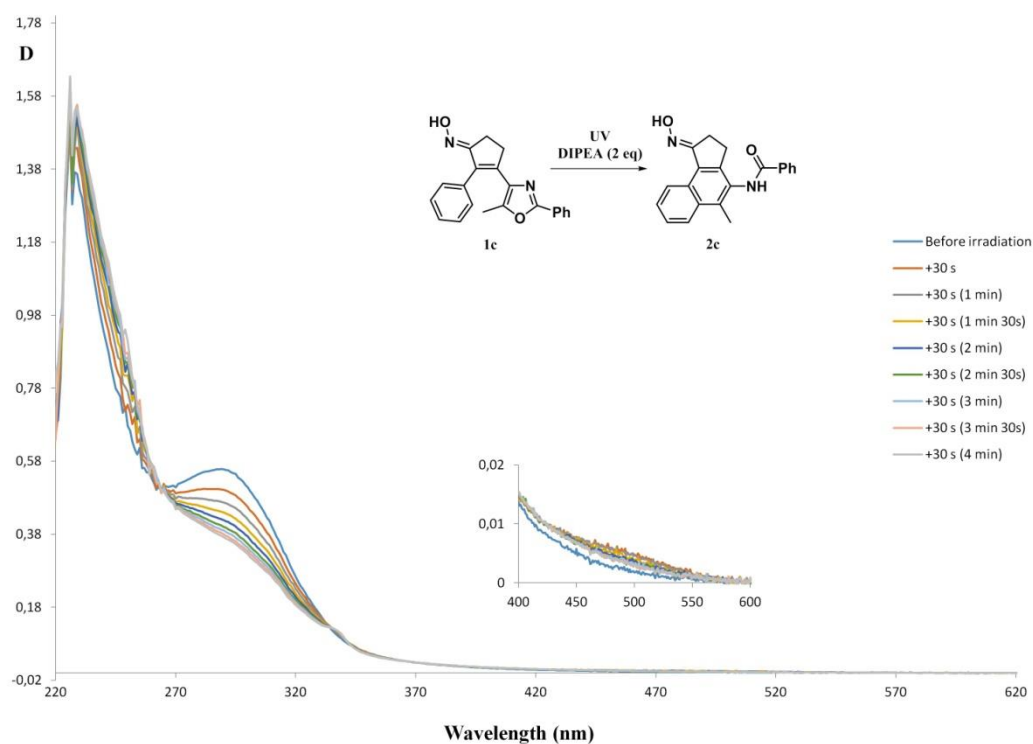

**Fig. S6.** Absorption spectra of an acetonitrile solution of **1c** with 2 eq DIPEA obtained under irradiation with UV light ( $\lambda = 365$  nm);  $C = 3.0 \times 10^{-5}$  M,  $T = 298^\circ\text{K}$ .



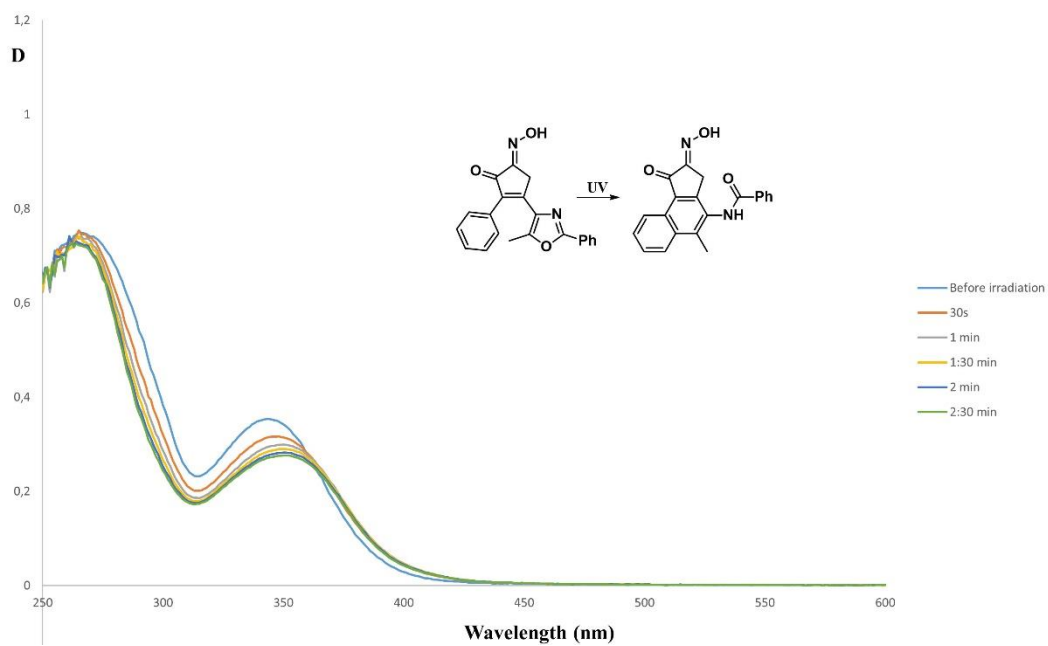

**Fig. S7.** Absorption spectra of an acetonitrile solution of **1d** obtained under irradiation with UV light ( $\lambda = 365$  nm);  $C = 3.0 \times 10^{-5}$  M,  $T = 298^\circ\text{K}$ .

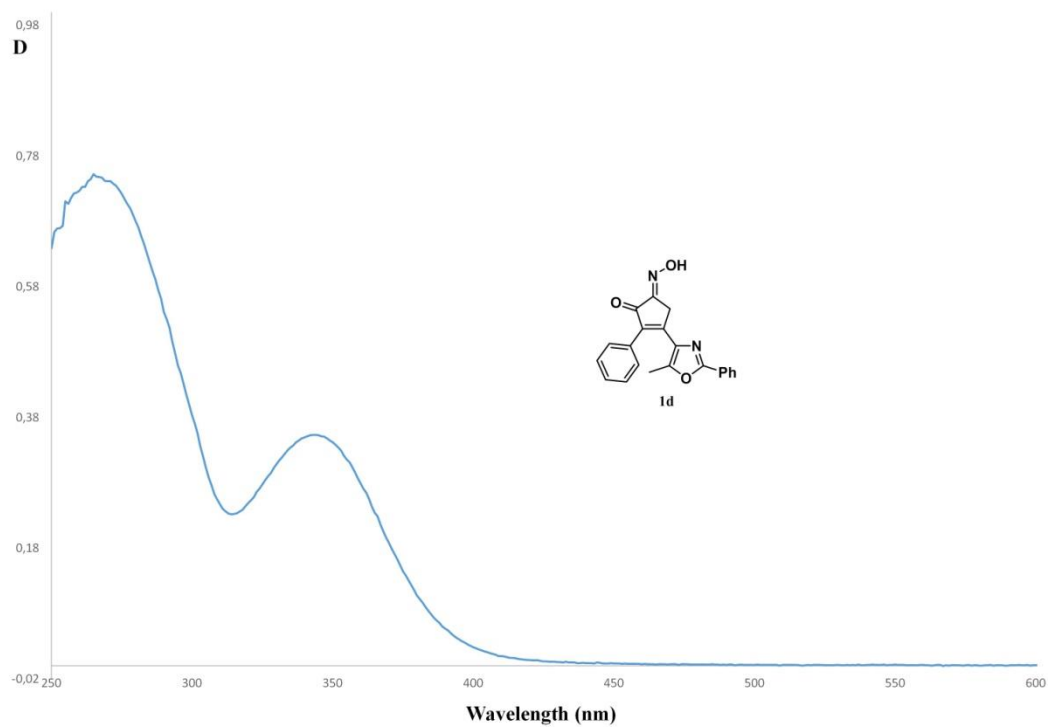

**Fig. S8.** UV absorption spectrum of diarylethene **1d** in acetonitrile solution ( $C = 3.0 \times 10^{-5}$  M),  $T = 298^\circ\text{K}$ .

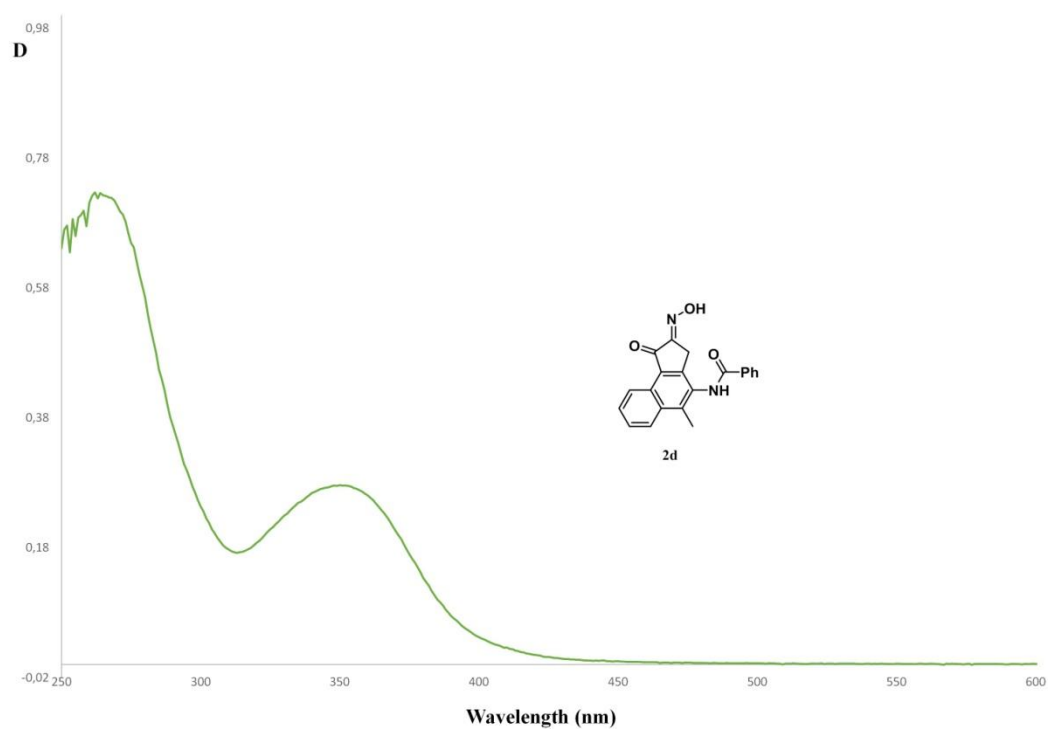

**Fig. S9.** UV absorption spectrum of photoproduct **2d** in acetonitrile solution ( $C = 3.0 \times 10^{-5}$  M),  $T = 298^\circ\text{K}$ .

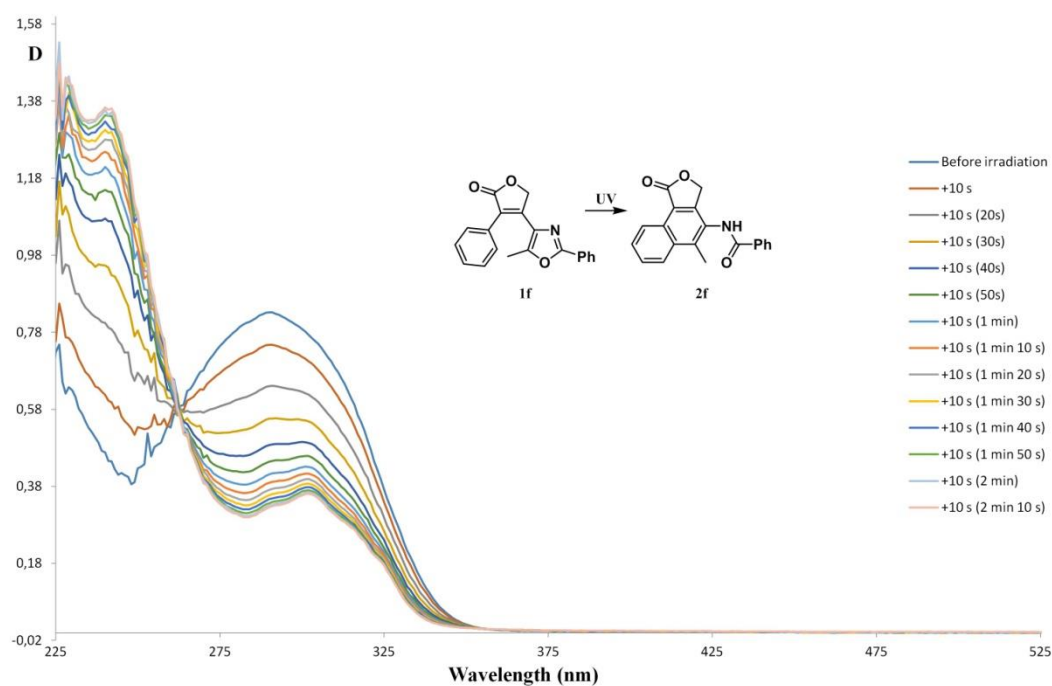

**Fig. S10.** Absorption spectra of an acetonitrile solution of **1f** obtained under irradiation with UV light ( $\lambda = 365$  nm);  $C = 3.0 \times 10^{-5}$  M,  $T = 298^\circ\text{K}$ .

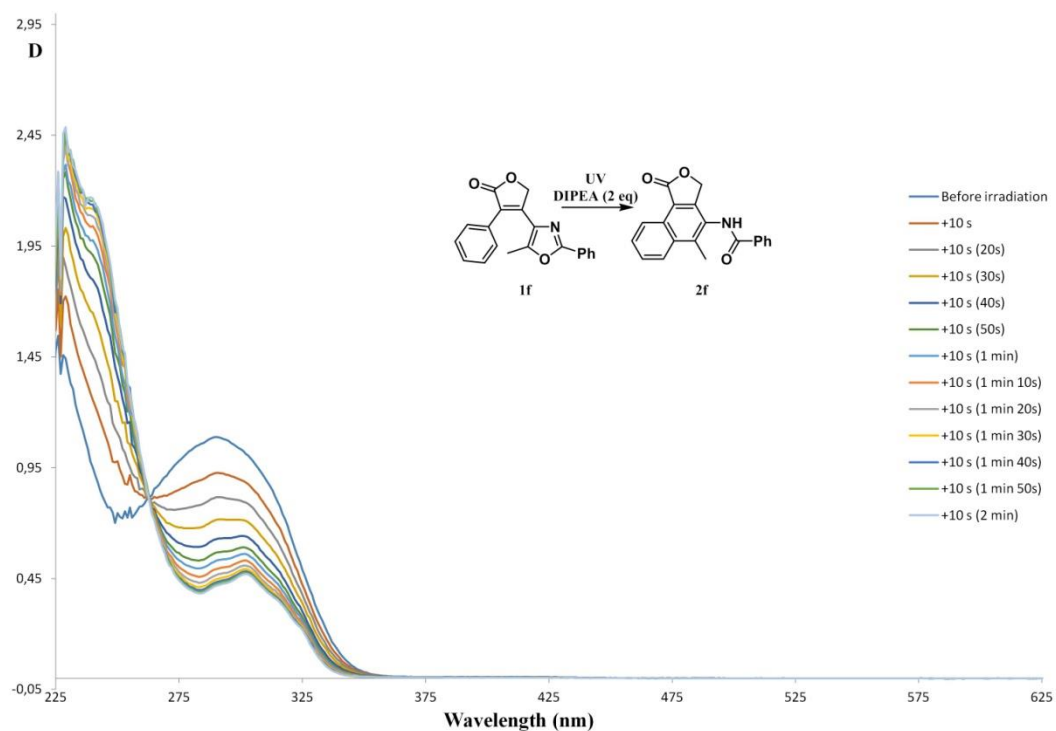

**Fig. S11.** Absorption spectra of an acetonitrile solution of **1f** with 2 eq DIPEA obtained under irradiation with UV light ( $\lambda = 365$  nm);  $C = 3.0 \times 10^{-5}$  M,  $T = 298^\circ\text{K}$ .

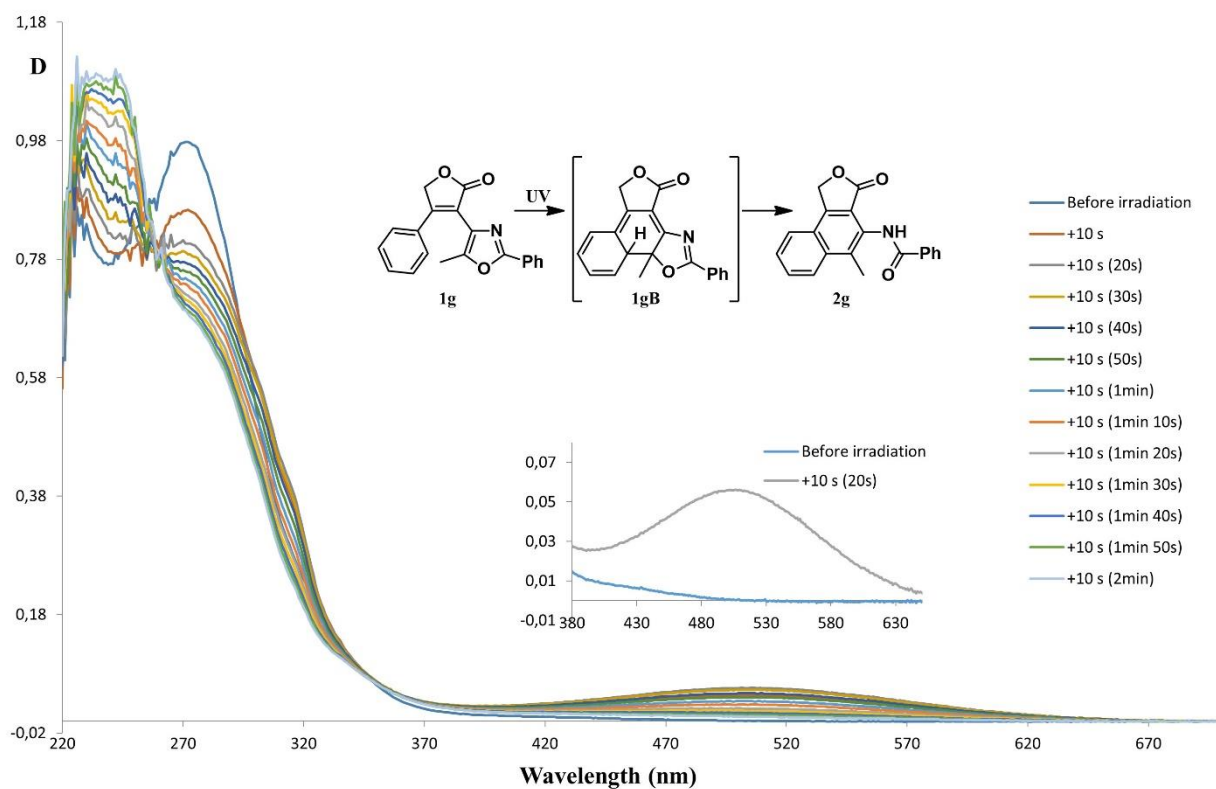

**Fig. S12.** Absorption spectra of an acetonitrile solution of **1g** obtained under irradiation with UV light ( $\lambda = 365$  nm);  $C = 3.0 \times 10^{-5}$  M,  $T = 298^\circ\text{K}$  and colored intermediate **1gB** observed at 525 nm (on inset).

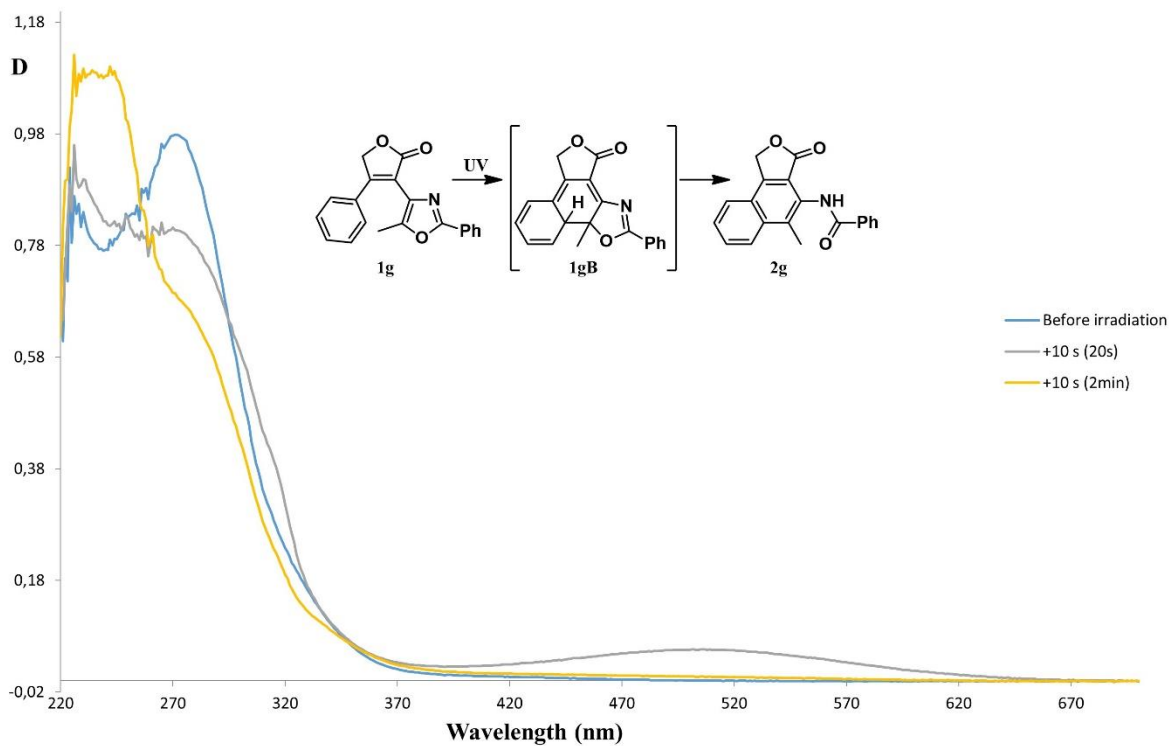

**Fig. S13.** Absorption spectra of **1g**, **1gB** and **2g** in acetonitrile solution ( $C = 3.0 \times 10^{-5}$  M),  
 $T = 298^\circ\text{K}$ .

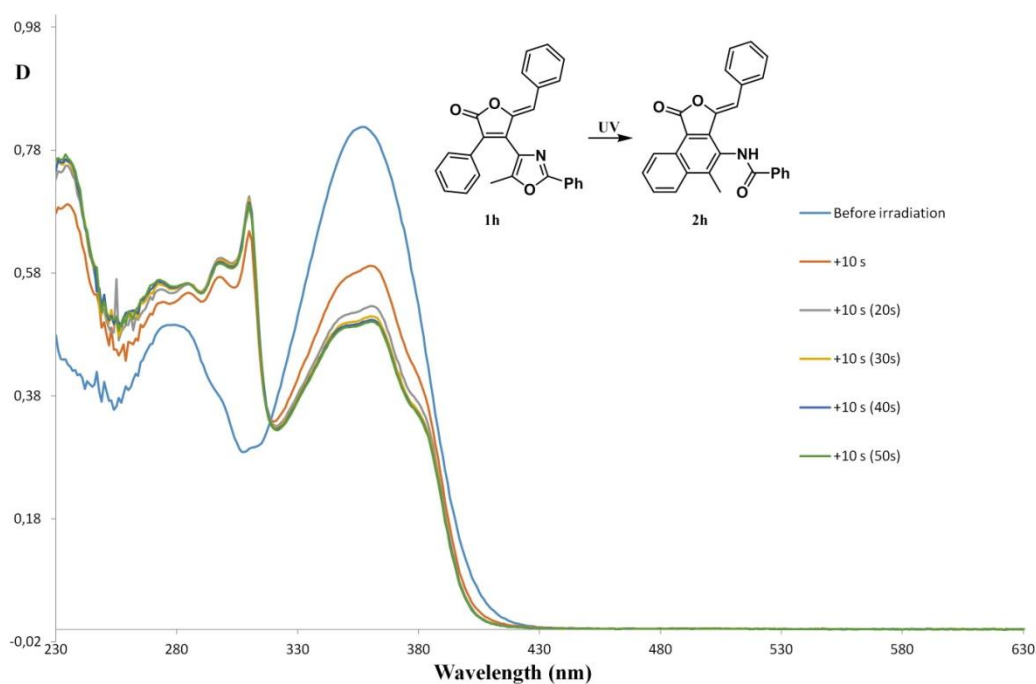

**Fig. S14.** Absorption spectra of an acetonitrile solution of **1h** obtained under irradiation with UV  
light ( $\lambda = 365$  nm);  $C = 3.0 \times 10^{-5}$  M,  $T = 298^\circ\text{K}$ .

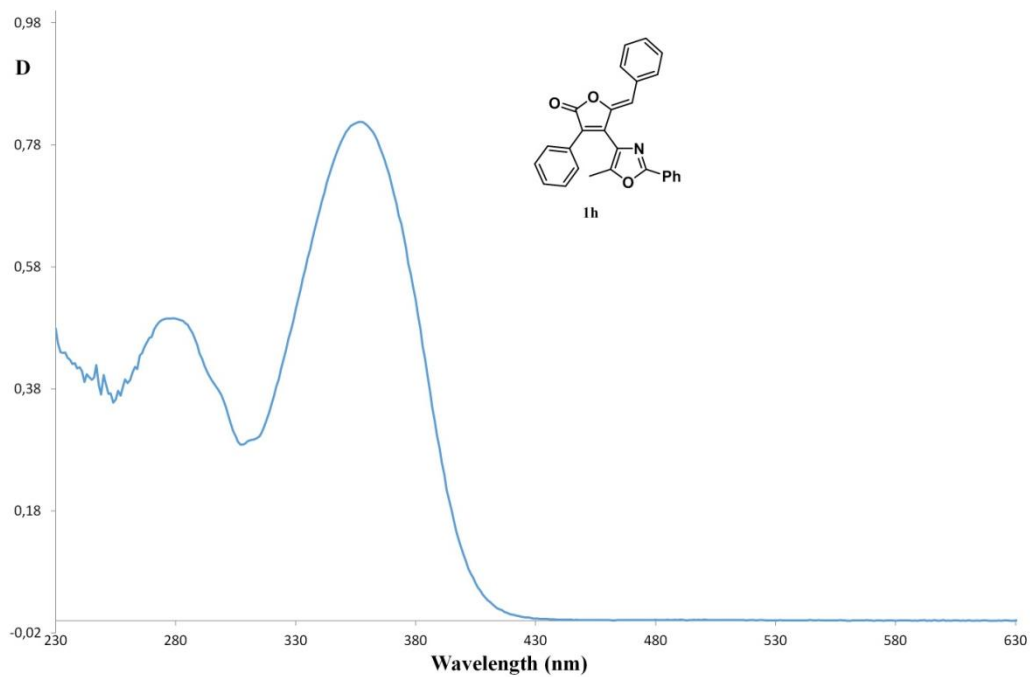

**Fig. S15.** UV absorption spectrum of diarylethene **1h** in acetonitrile solution ( $C = 3.0 \times 10^{-5}$  M),  
 $T = 298^\circ\text{K}$ .

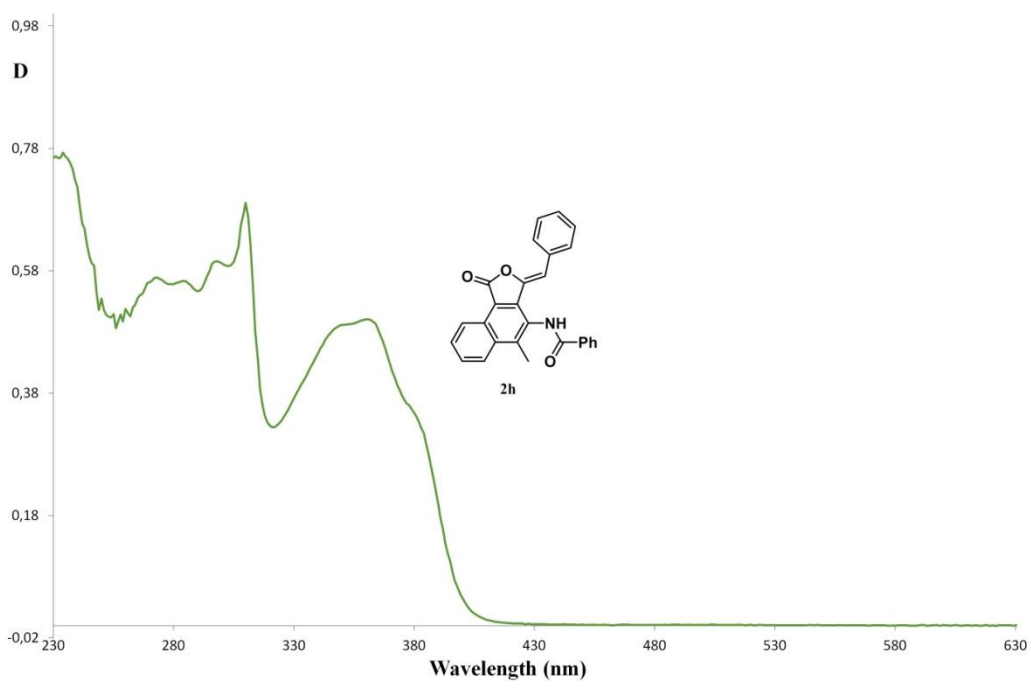

**Fig. S16.** UV absorption spectrum of photoproduct **2h** in acetonitrile solution ( $C = 3.0 \times 10^{-5}$  M),  
 $T = 298^\circ\text{K}$ .

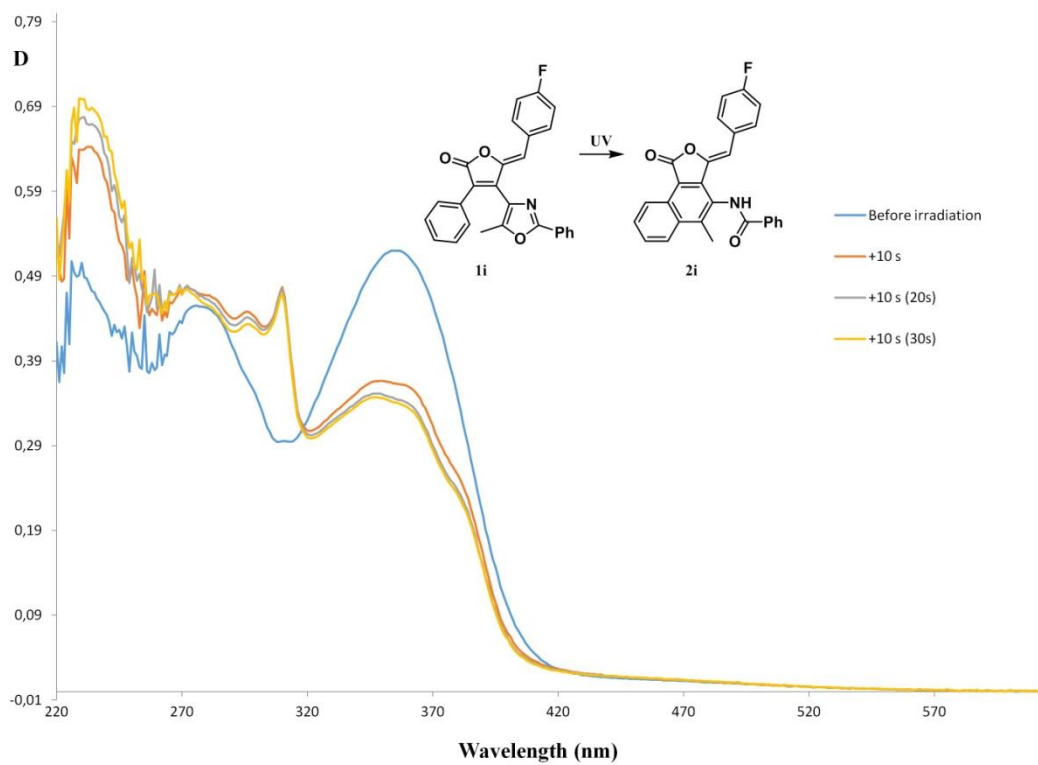

**Fig. S17.** Absorption spectra of an acetonitrile solution of **1i** obtained under irradiation with UV light ( $\lambda = 365$  nm);  $C = 3.0 \times 10^{-5}$  M,  $T = 298^\circ\text{K}$ .

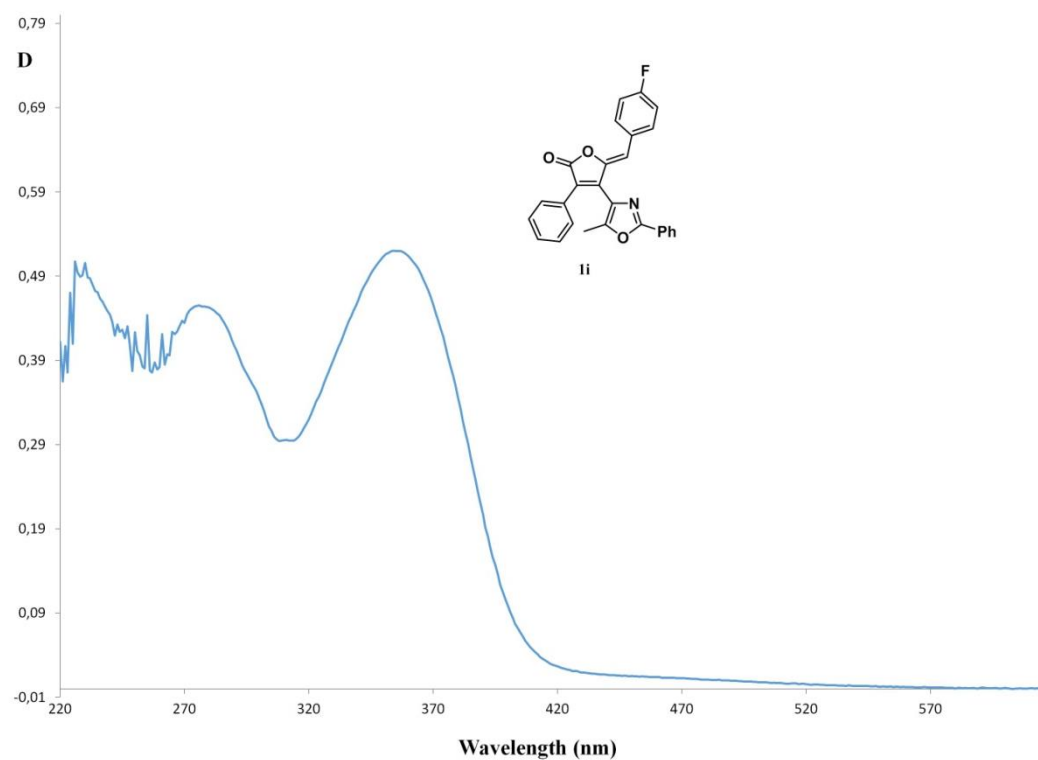

**Fig. S18.** UV absorption spectrum of diarylethene **1i** in acetonitrile solution ( $C = 3.0 \times 10^{-5}$  M),  $T = 298^\circ\text{K}$ .

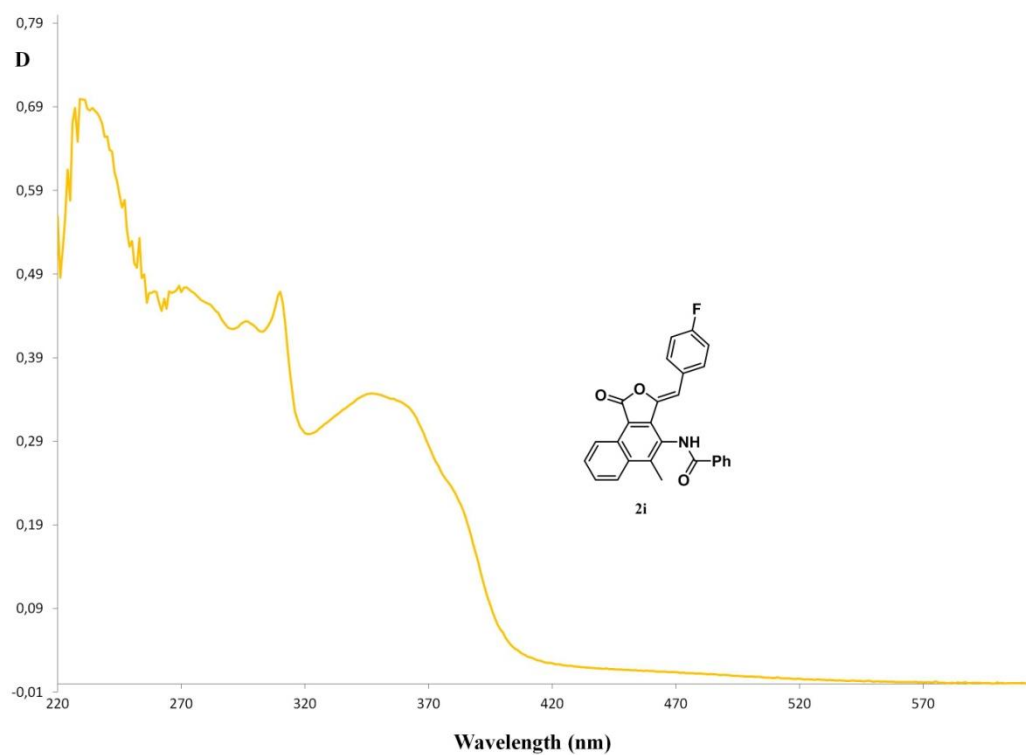

**Fig. S19.** UV absorption spectrum of photoproduct **2i** in acetonitrile solution ( $C = 3.0 \times 10^{-5}$  M),  $T = 298^\circ\text{K}$ .

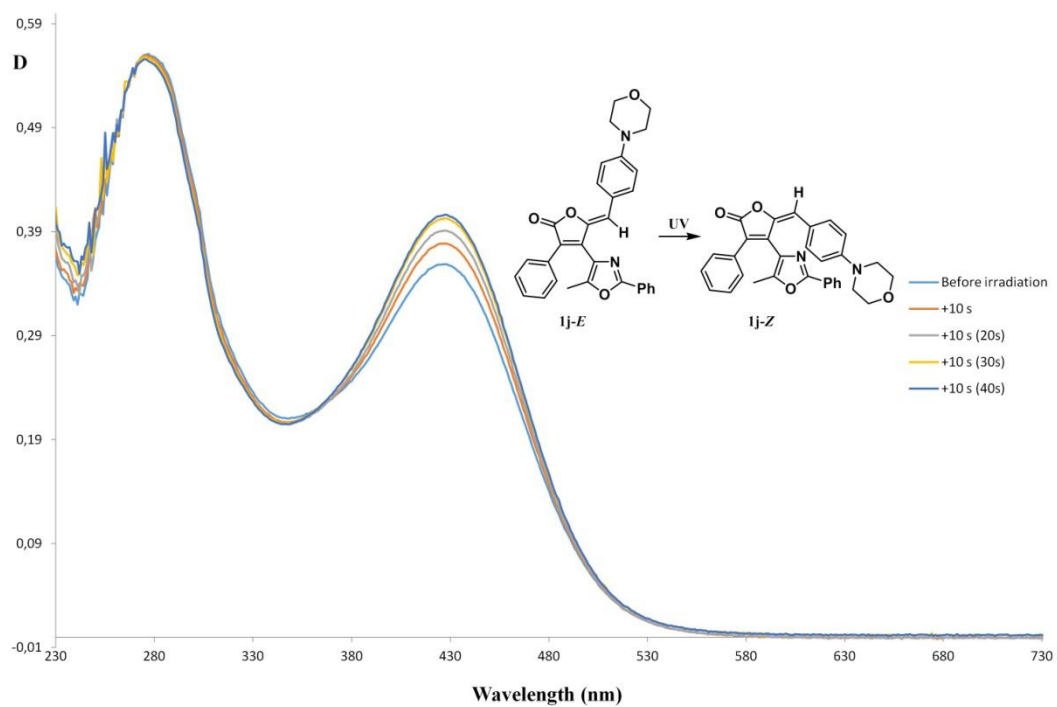

**Fig. S20.** Changes in the absorption spectrum of diarylethene **1j-E** under irradiation with UV light ( $\lambda = 365$  nm);  $C = 3.0 \times 10^{-5}$  M,  $T = 298^\circ\text{K}$ .

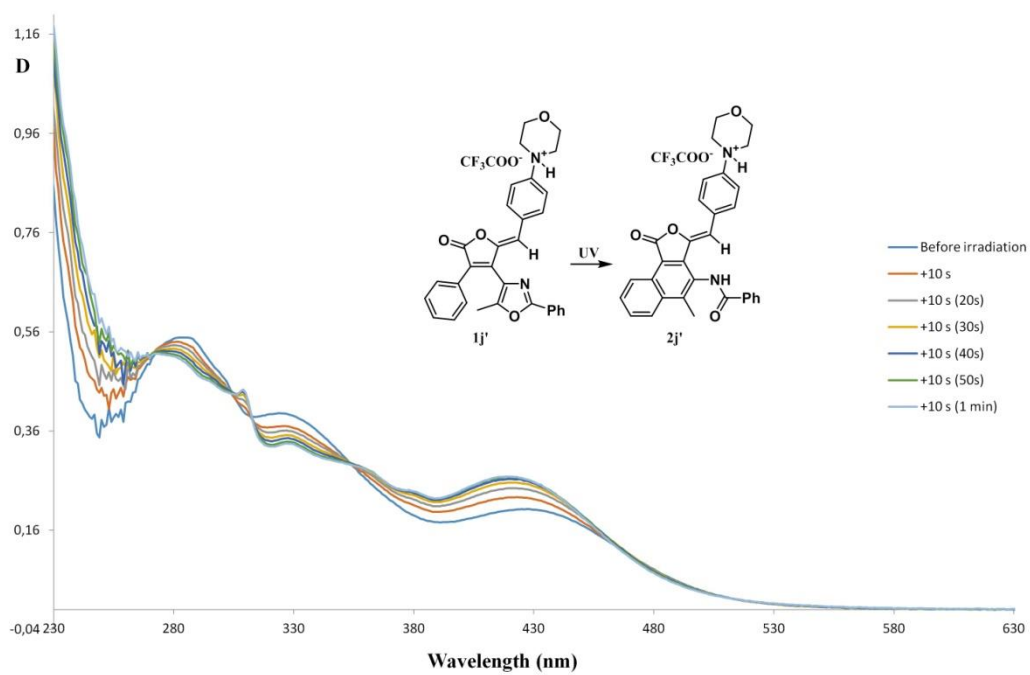

**Fig. S21.** Changes in the absorption spectrum of diarylethene **1j'** under irradiation with UV light (365 nm) in acetonitrile solution in the presence of 10 eq  $\text{CF}_3\text{COOH}$  ( $C = 3.0 \times 10^{-5} \text{ M}$ ),  $T = 298^\circ\text{K}$ .



VI. Copies of  $^1\text{H}$  and  $^{13}\text{C}$  NMR spectra

(*E*)-3-(5-methyl-2-phenyloxazol-4-yl)-2-phenylcyclopent-2-enone oxime (1c)

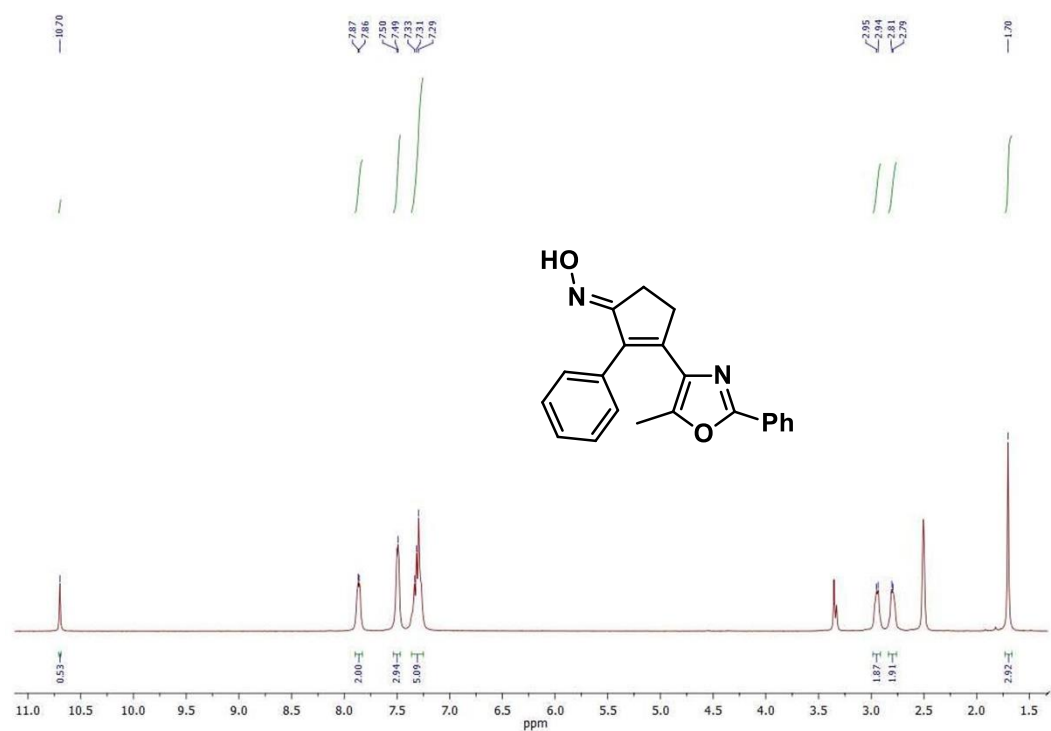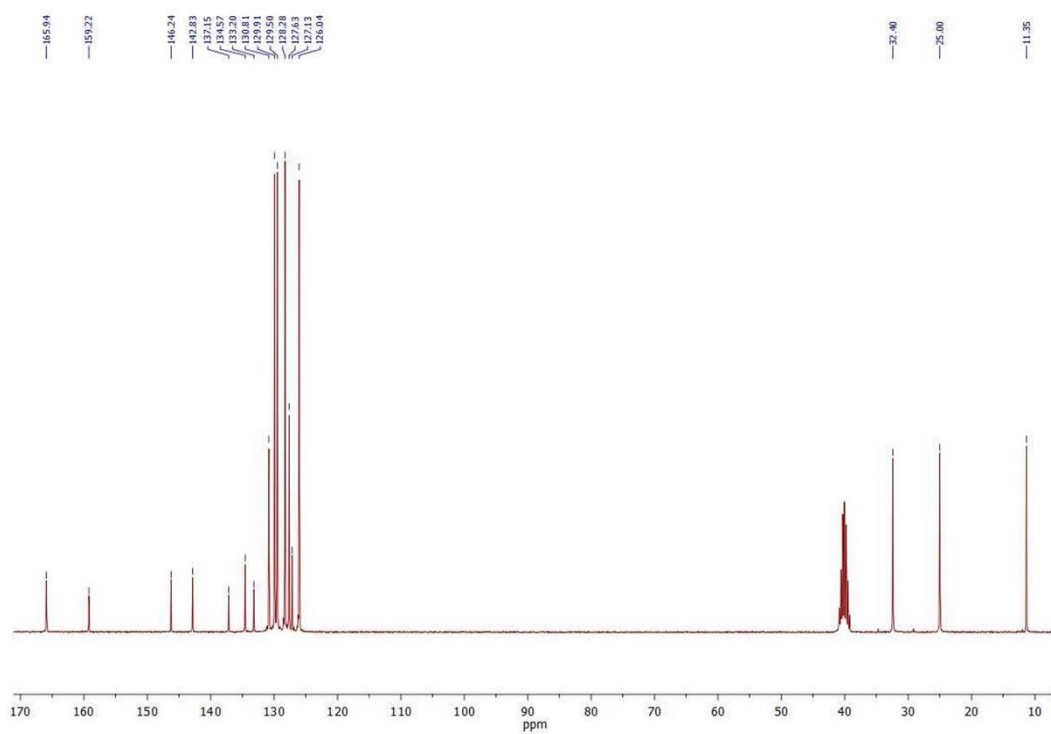

**(E)-5-(hydroxyimino)-3-(5-methyl-2-phenyloxazol-4-yl)-2-phenylcyclopent-2-enone (1d)**

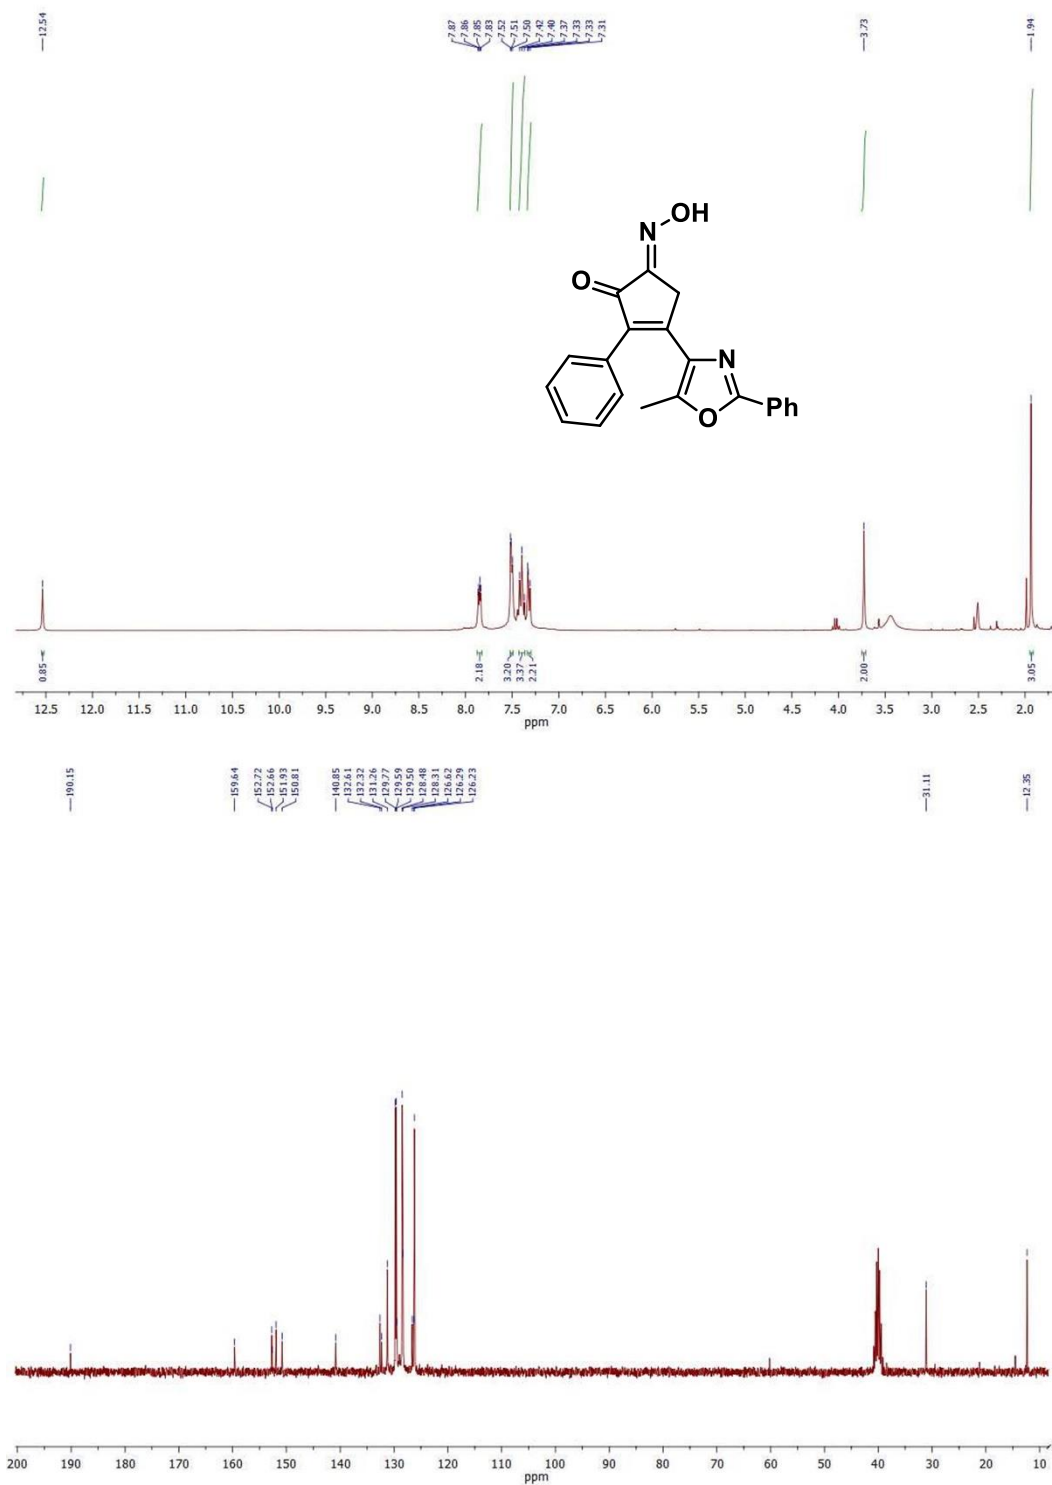

VII. Copies of  $^1\text{H}$  and  $^{13}\text{C}$  NMR spectra of photoproducts

*N*-(5-methyl-1-oxo-2,3-dihydro-1*H*-cyclopenta[*a*]naphthalen-4-yl)benzamide (2a)

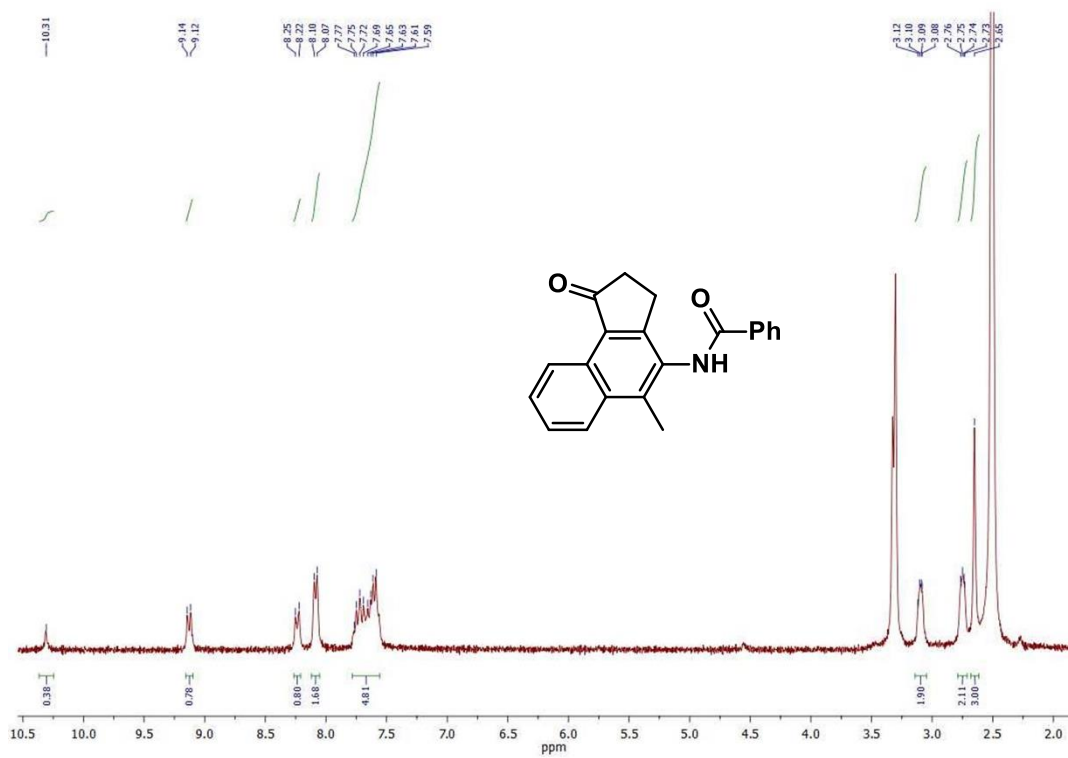

***N*-(5-methyl-3-oxo-2,3-dihydro-1*H*-cyclopenta[*a*]naphthalen-4-yl)benzamide (2b)**

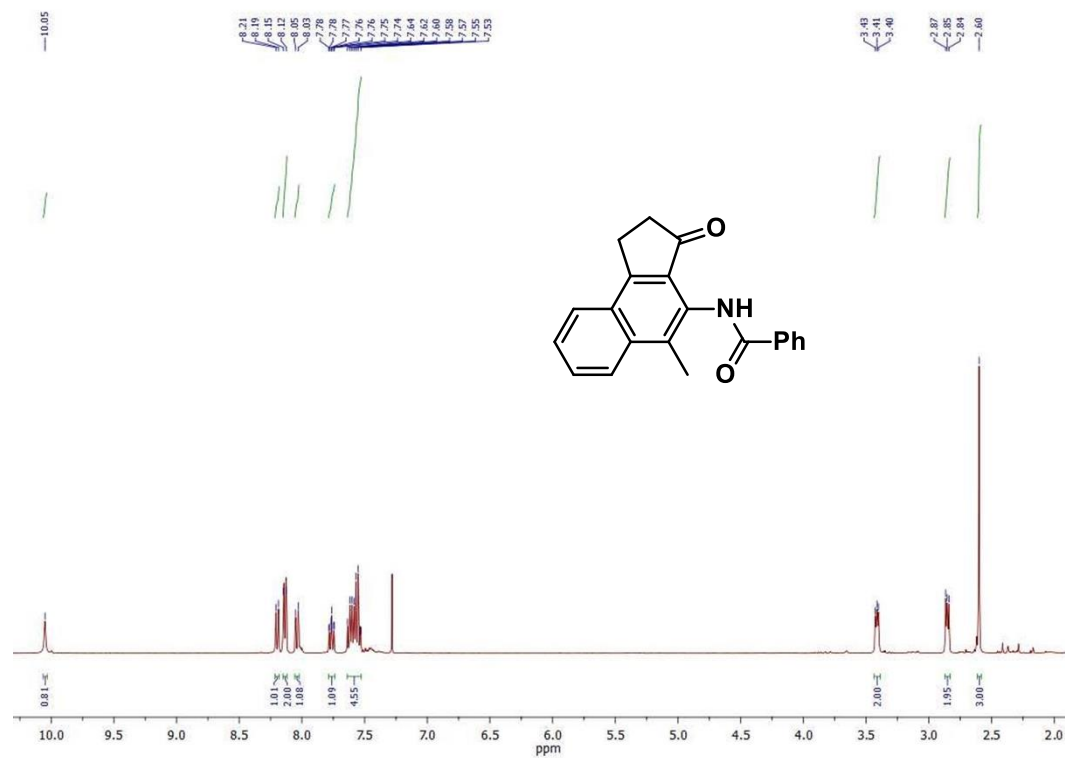



**(E)-N-(2-(hydroxyimino)-5-methyl-1-oxo-2,3-dihydro-1H-cyclopenta[a]naphthalen-4-yl)benzamide (2d)**

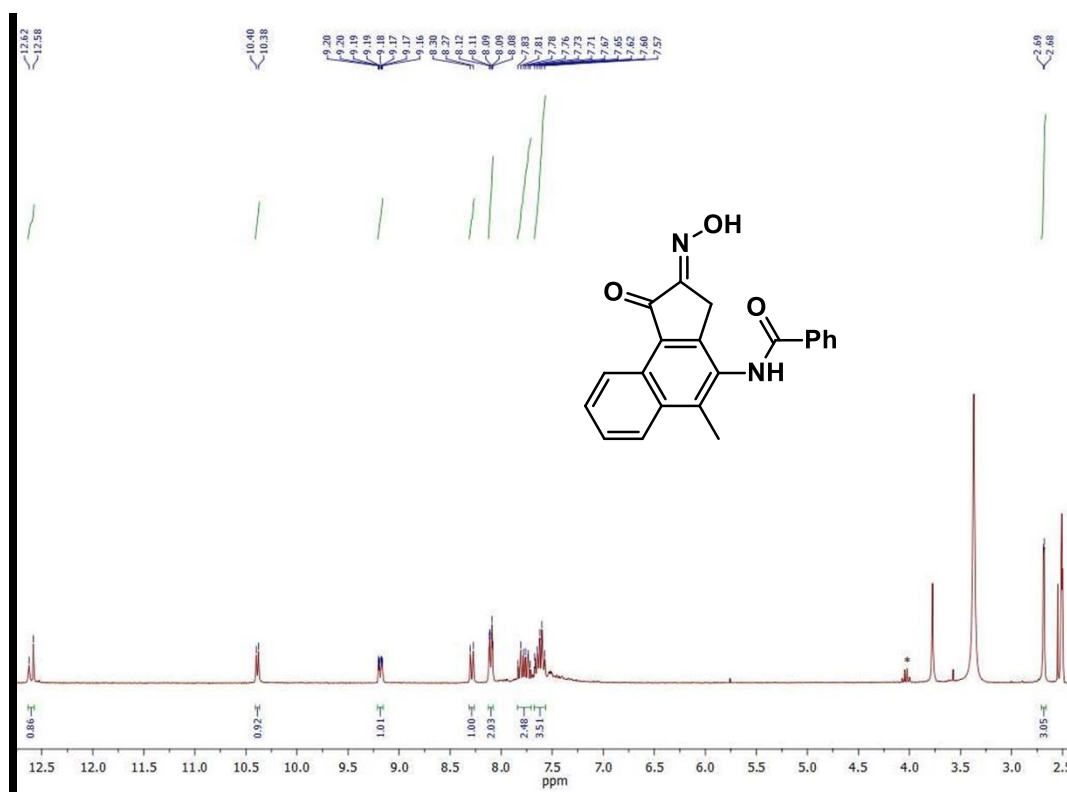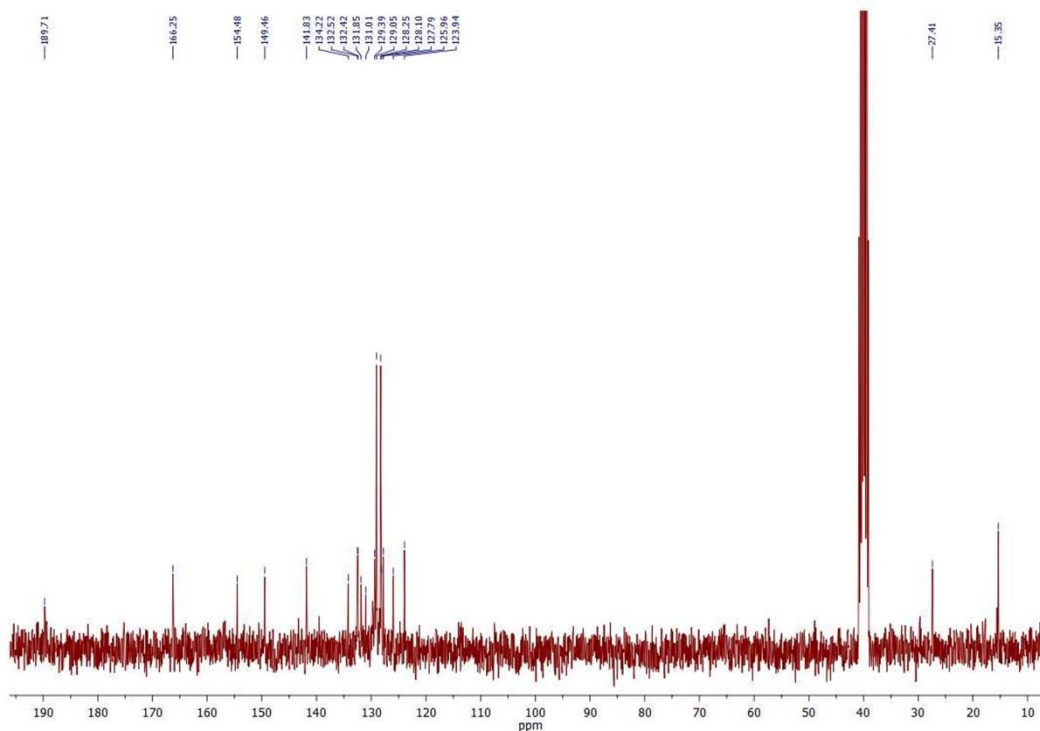

***N*-(5-methyl-2,3-dihydro-1*H*-cyclopenta[*a*]naphthalen-4-yl)benzamide (2e)**

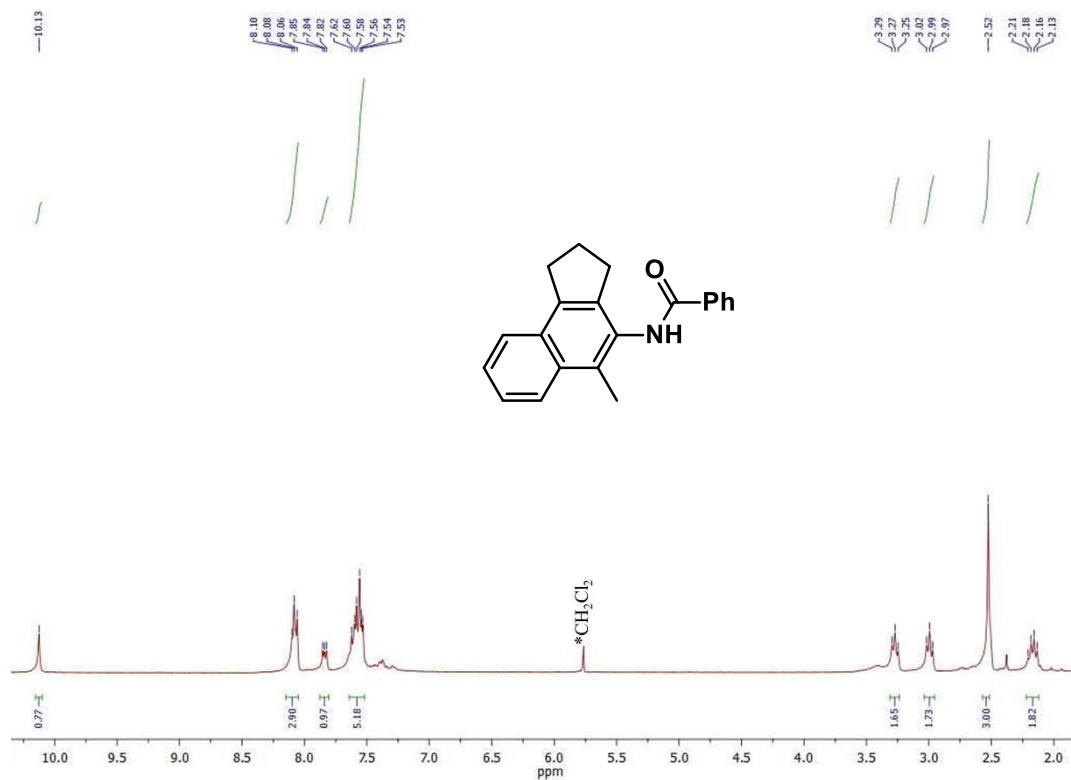

***N*-(5-methyl-1-oxo-1,3-dihydrophtho[1,2-*c*]furan-4-yl)benzamide (2f)**

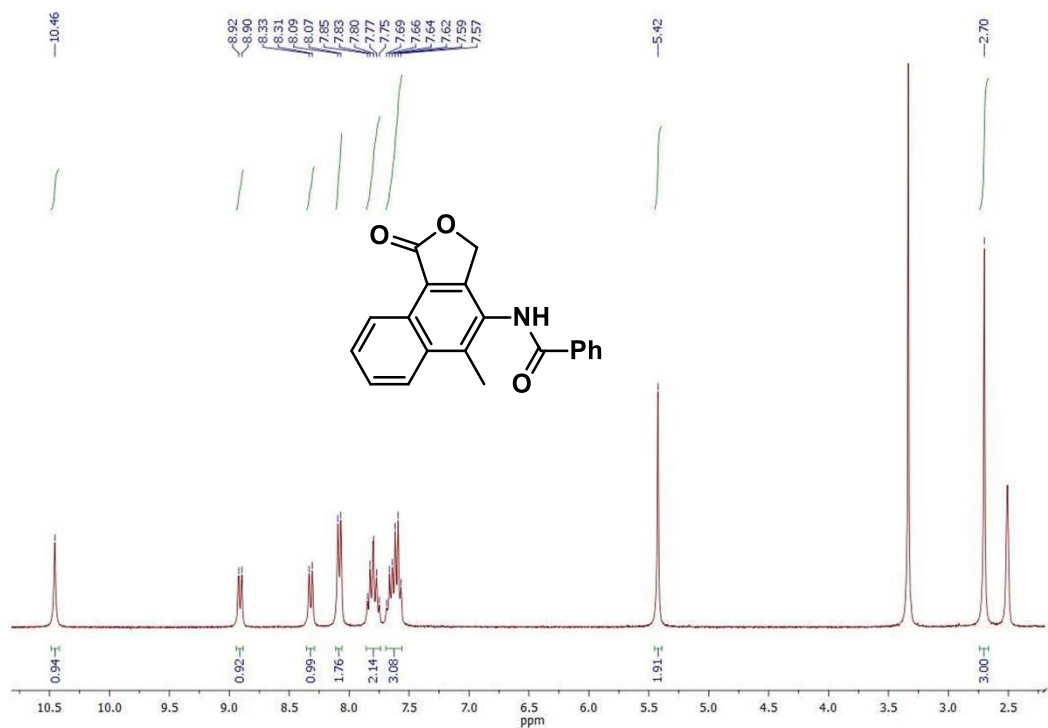



***N*-(5-methyl-3-oxo-1,3-dihydrophtho[1,2-*c*]furan-4-yl)benzamide (2g)**

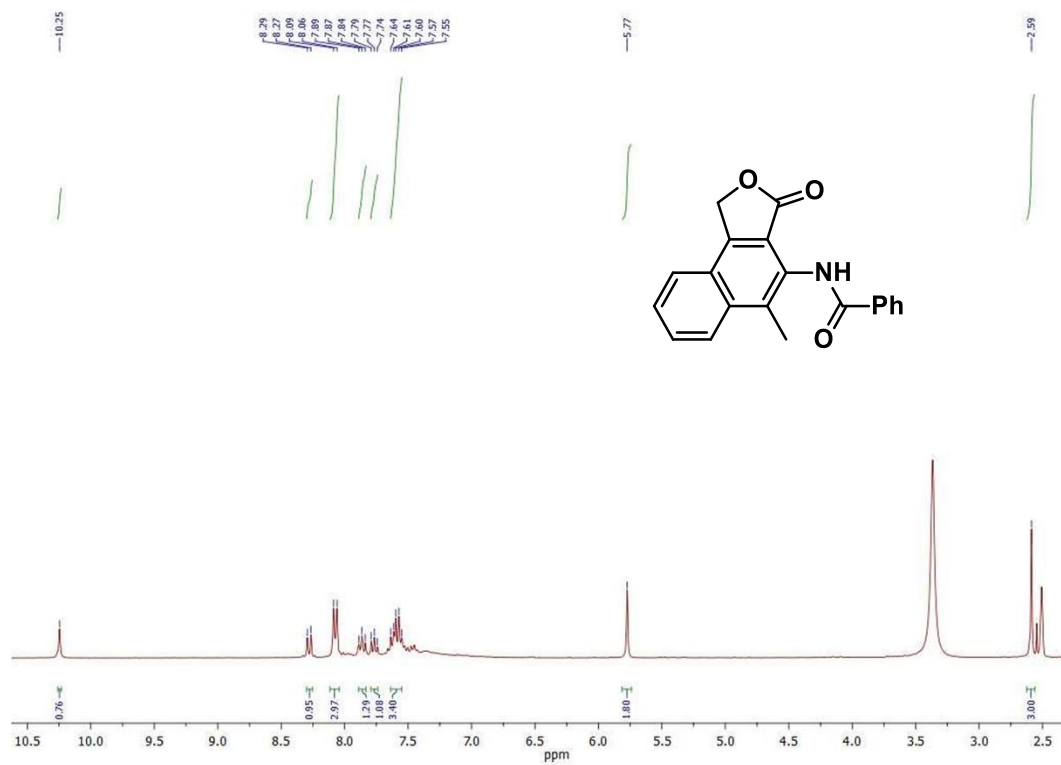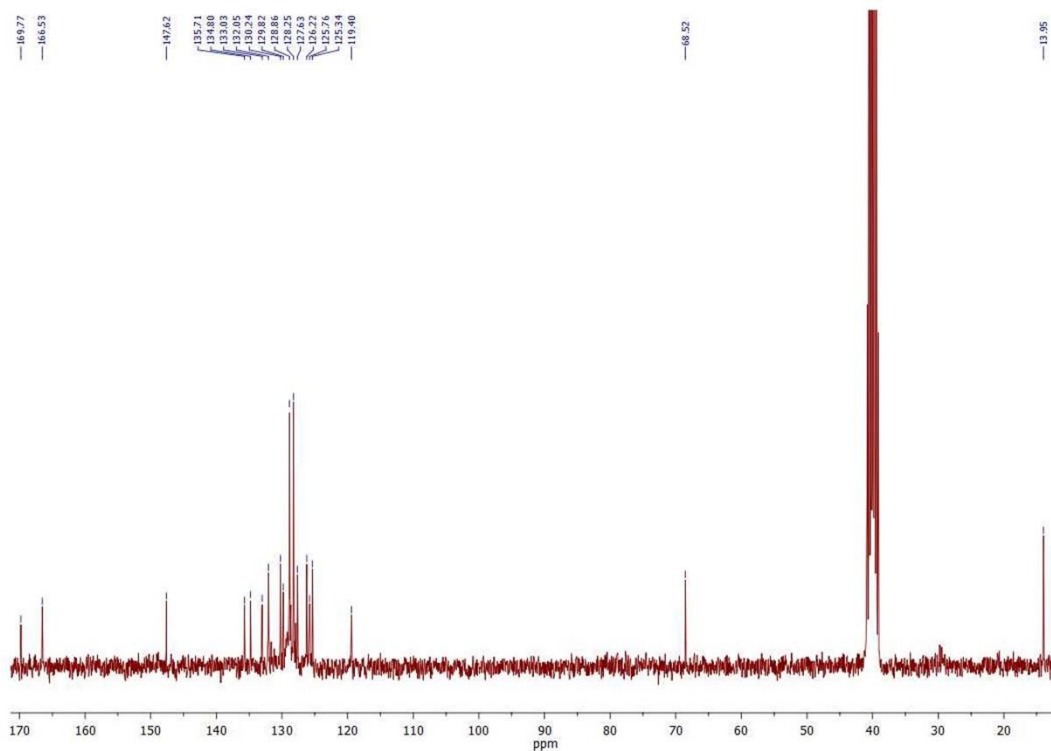

### VIII. Copies of HRMS spectra

#### (E)-3-(5-methyl-2-phenyloxazol-4-yl)-2-phenylcyclopent-2-enone oxime (1c)

##### Acquisition Parameter

|             |            |                      |          |                  |           |
|-------------|------------|----------------------|----------|------------------|-----------|
| Source Type | ESI        | Ion Polarity         | Positive | Set Nebulizer    | 0.4 Bar   |
| Focus       | Not active |                      |          | Set Dry Heater   | 180 °C    |
| Scan Begin  | 50 m/z     | Set Capillary        | 4500 V   | Set Dry Gas      | 4.0 l/min |
| Scan End    | 3000 m/z   | Set End Plate Offset | -500 V   | Set Divert Valve | Waste     |

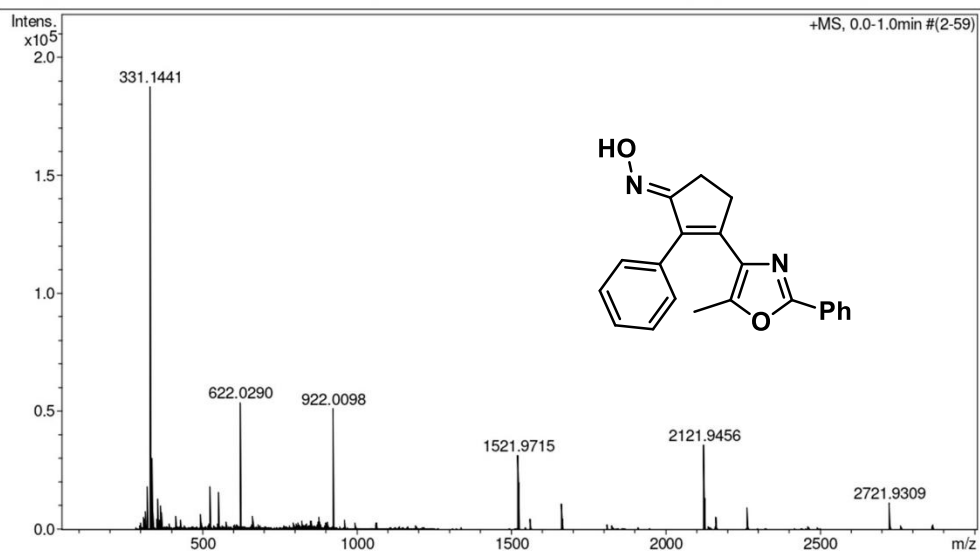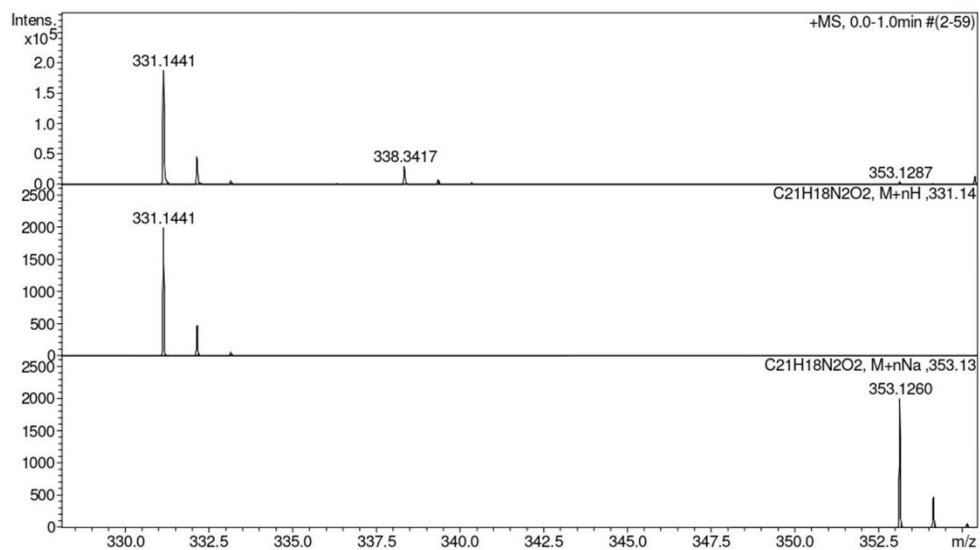

**(E)-5-(hydroxyimino)-3-(5-methyl-2-phenyloxazol-4-yl)-2-phenylcyclopent-2-enone (1d)**

**Acquisition Parameter**

|             |            |                      |          |                  |           |
|-------------|------------|----------------------|----------|------------------|-----------|
| Source Type | ESI        | Ion Polarity         | Positive | Set Nebulizer    | 1.0 Bar   |
| Focus       | Not active |                      |          | Set Dry Heater   | 200 °C    |
| Scan Begin  | 50 m/z     | Set Capillary        | 4500 V   | Set Dry Gas      | 4.0 l/min |
| Scan End    | 1600 m/z   | Set End Plate Offset | -500 V   | Set Divert Valve | Waste     |

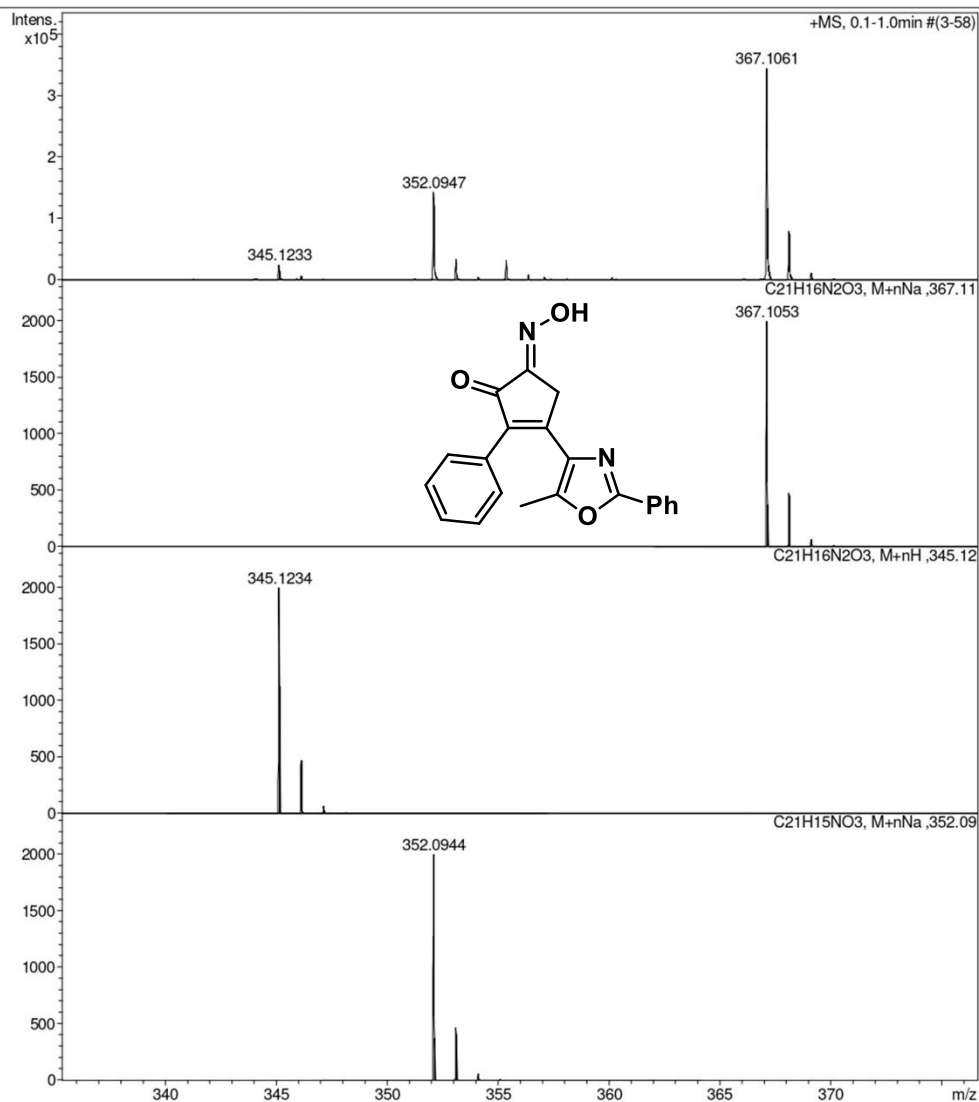

**(E)-N-(1-(hydroxyimino)-5-methyl-2,3-dihydro-1H-cyclopenta[a]naphthalen-4-yl)benzamide (2c)**

**Acquisition Parameter**

|             |            |                      |          |                  |           |
|-------------|------------|----------------------|----------|------------------|-----------|
| Source Type | ESI        | Ion Polarity         | Positive | Set Nebulizer    | 0.4 Bar   |
| Focus       | Not active |                      |          | Set Dry Heater   | 180 °C    |
| Scan Begin  | 50 m/z     | Set Capillary        | 4500 V   | Set Dry Gas      | 4.0 l/min |
| Scan End    | 3000 m/z   | Set End Plate Offset | -500 V   | Set Divert Valve | Waste     |

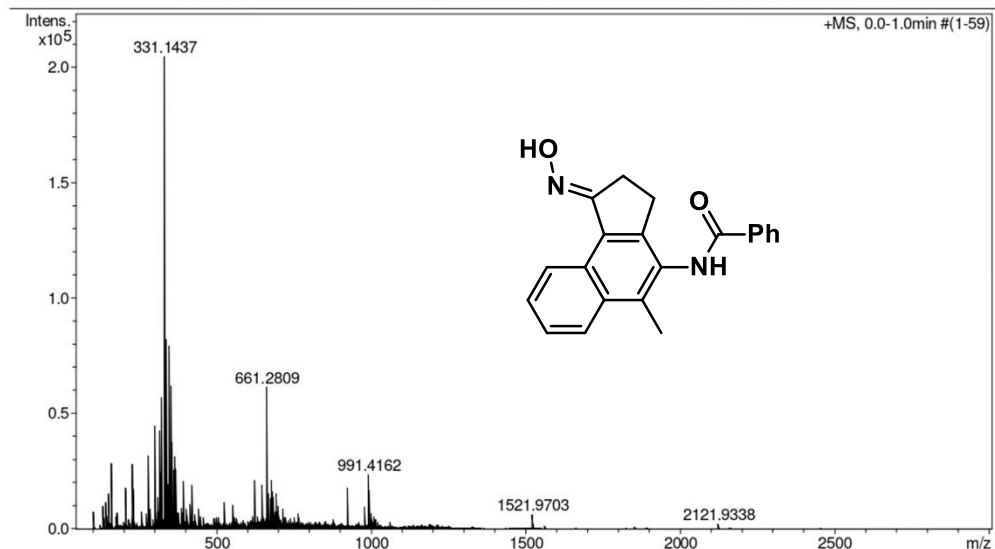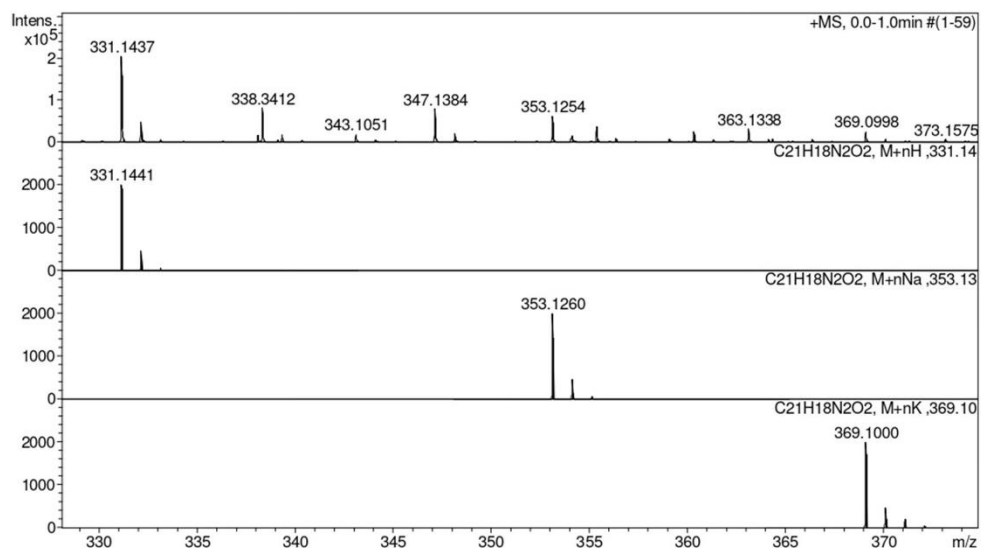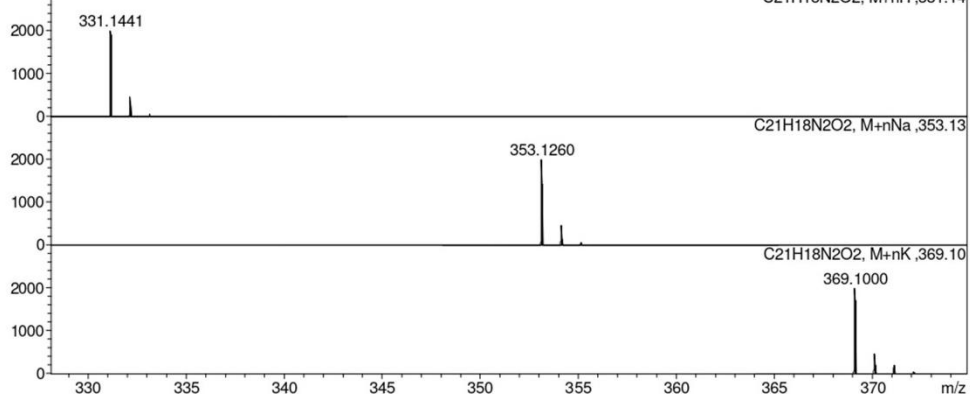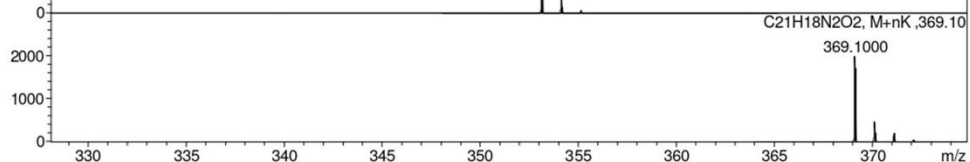

**(E)-N-(2-(hydroxyimino)-5-methyl-1-oxo-2,3-dihydro-1H-cyclopenta[a]naphthalen-4-yl)benzamide (2d)**

| Acquisition Parameter |            |                      |          |                  |           |
|-----------------------|------------|----------------------|----------|------------------|-----------|
| Source Type           | ESI        | Ion Polarity         | Positive | Set Nebulizer    | 0.4 Bar   |
| Focus                 | Not active |                      |          | Set Dry Heater   | 180 °C    |
| Scan Begin            | 50 m/z     | Set Capillary        | 4500 V   | Set Dry Gas      | 4.0 l/min |
| Scan End              | 3000 m/z   | Set End Plate Offset | -500 V   | Set Divert Valve | Waste     |

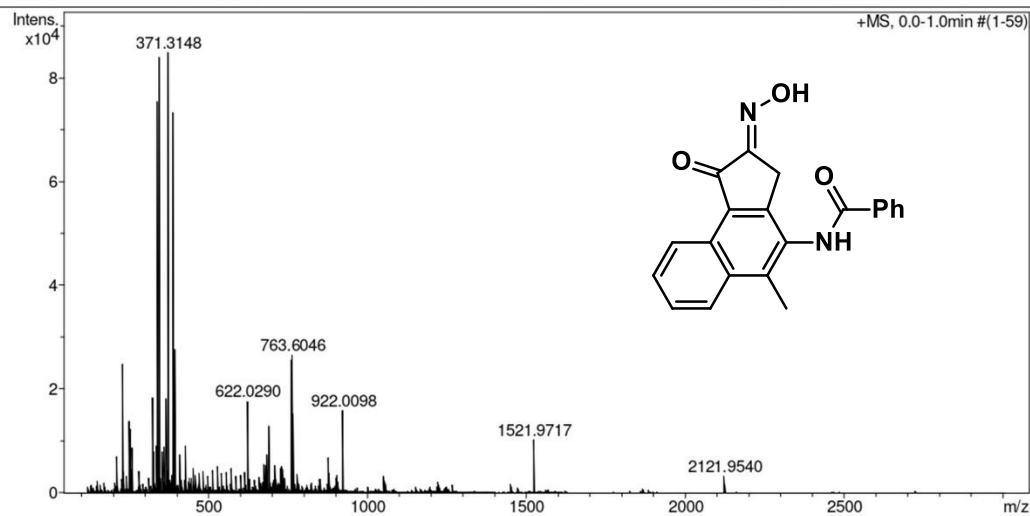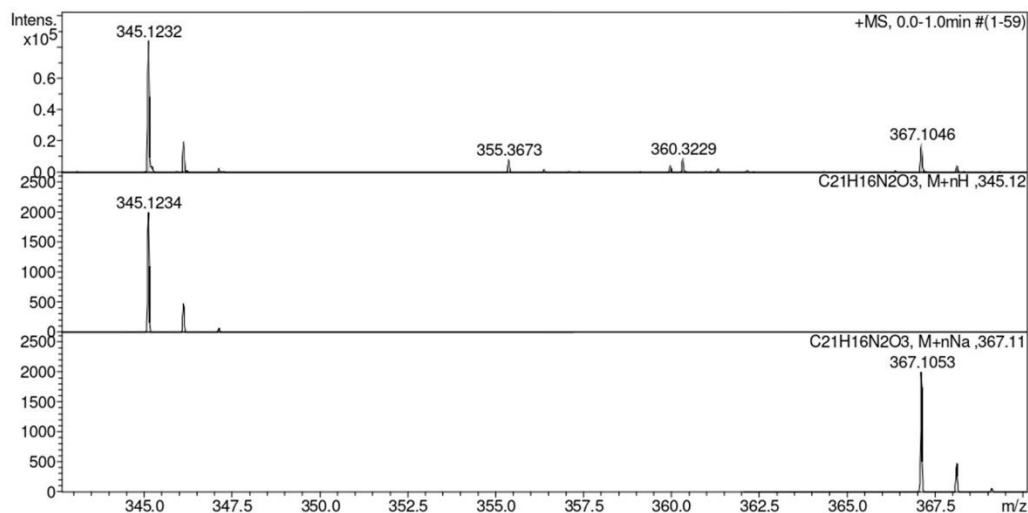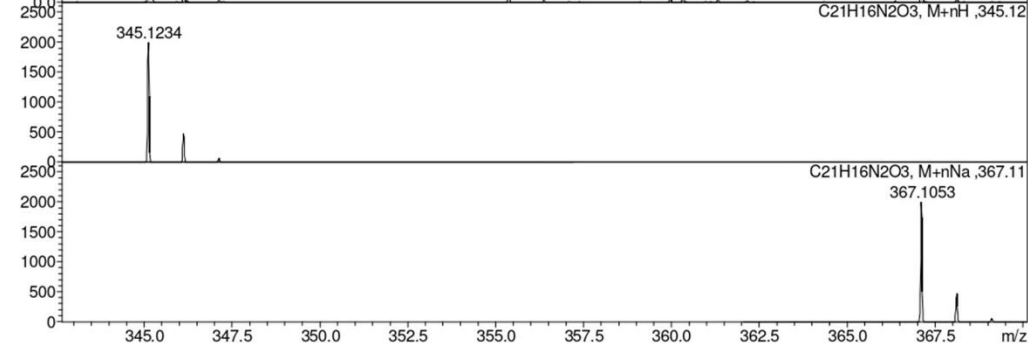

# *N*-(5-methyl-3-oxo-1,3-dihydrophtho[1,2-*c*]furan-4-yl)benzamide (2g)

## Acquisition Parameter

|             |            |                      |          |                  |           |
|-------------|------------|----------------------|----------|------------------|-----------|
| Source Type | ESI        | Ion Polarity         | Positive | Set Nebulizer    | 0.4 Bar   |
| Focus       | Not active |                      |          | Set Dry Heater   | 180 °C    |
| Scan Begin  | 50 m/z     | Set Capillary        | 4500 V   | Set Dry Gas      | 4.0 l/min |
| Scan End    | 1600 m/z   | Set End Plate Offset | -500 V   | Set Divert Valve | Waste     |

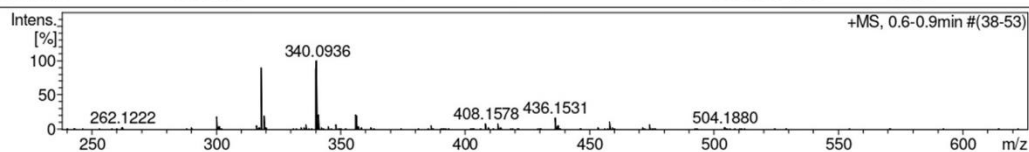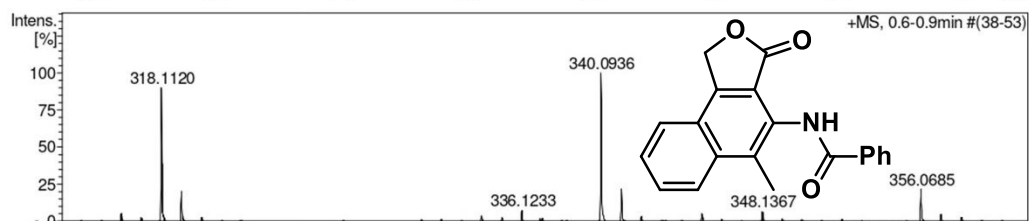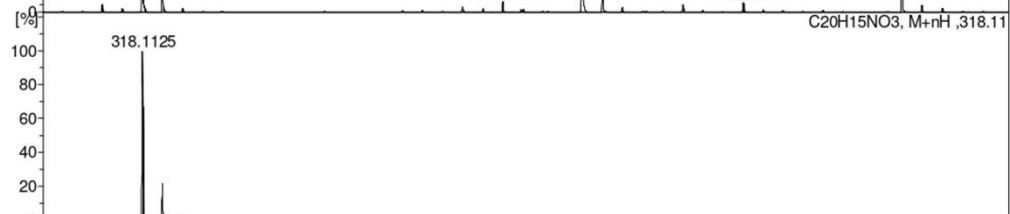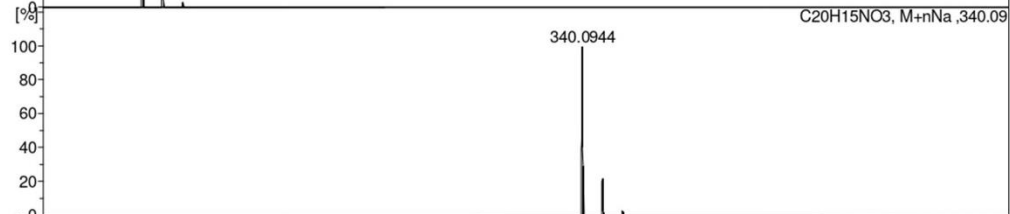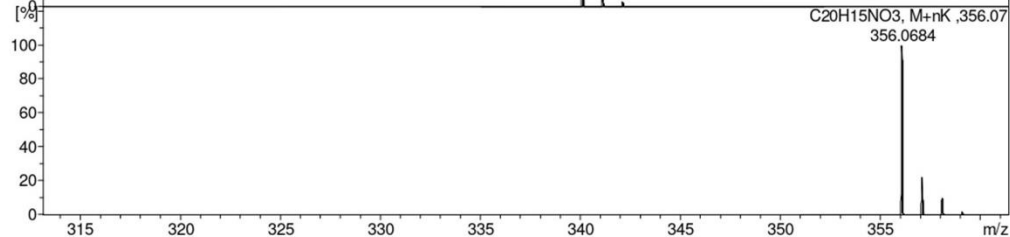

Supplement: d2ob02315f1.pdf [file d2ob02315f1.pdf]
